# Supplementary material
Source: HighWire-hosted journal article supplement (https://ard.bmj.com/content/82/5/698)

## SUPPLEMENTARY TABLES AND FIGURES

| <b>Supplementary table 1.</b> Baseline characteristics of the study population (total, and stratified by medication group) |                                   |                                   |                                    |                                   |                               |                                |                                      |
|----------------------------------------------------------------------------------------------------------------------------|-----------------------------------|-----------------------------------|------------------------------------|-----------------------------------|-------------------------------|--------------------------------|--------------------------------------|
| Parameter                                                                                                                  | No DMARDs                         | csDMARDs only                     | TNFi                               | IL-17i/IL-23i/IL12+23i            | JAKi                          | APREMILAST                     | TOTAL                                |
| <b>N</b>                                                                                                                   | <b>722</b>                        | <b>867</b>                        | <b>2298</b>                        | <b>1017</b>                       | <b>62</b>                     | <b>79</b>                      | <b>5045</b>                          |
| <b>General</b>                                                                                                             |                                   |                                   |                                    |                                   |                               |                                |                                      |
| Age [years]                                                                                                                | 49.9 (15.2)                       | 54 (13.4)                         | 48.3 (13.0)                        | 49.9 (12.8)                       | 54.3 (12.5)                   | 56.2 (11.9)                    | 50 (13.5)                            |
| ≤ 30 years                                                                                                                 | 81 (11.2)                         | 36 (4.2)                          | 226 (9.8)                          | 72 (7.1)                          | 3 (4.8)                       | 3 (3.8)                        | 421 (8.3)                            |
| 31 – 50 years                                                                                                              | 281 (38.9)                        | 291 (33.6)                        | 1044 (45.4)                        | 433 (42.6)                        | 19 (30.6)                     | 17 (21.5)                      | 2085 (41.3)                          |
| 51 – 65 years                                                                                                              | 252 (34.9)                        | 377 (43.5)                        | 836 (36.4)                         | 402 (39.5)                        | 24 (38.7)                     | 44 (55.7)                      | 1935 (38.4)                          |
| 66 - 75 years                                                                                                              | 70 (9.7)                          | 111 (12.8)                        | 152 (6.6)                          | 88 (8.7)                          | 16 (25.8)                     | 11 (13.9)                      | 448 (8.9)                            |
| > 75 years                                                                                                                 | 38 (5.3)                          | 52 (6)                            | 40 (1.7)                           | 22 (2.2)                          | 0                             | 4 (5.1)                        | 156 (3.1)                            |
| Male sex                                                                                                                   | 357 (49.4)                        | 385 (44.4)                        | 1267 (55.1)                        | 546 (53.7)                        | 20 (32.3)                     | 31 (39.2)                      | 2606 (51.7)                          |
| Ever smoker                                                                                                                | 159 (29.6)<br>(N=538)<br>(NA=184) | 196 (31.2)<br>(N=628)<br>(NA=239) | 517 (29.1)<br>(N=1777)<br>(NA=521) | 308 (35.0)<br>(N=879)<br>(NA=138) | 9 (19.6)<br>(N=46)<br>(NA=16) | 24 (34.8)<br>(N=69)<br>(NA=10) | 1213 (30.8)<br>(N=3937)<br>(NA=1108) |
| <b>Regions</b>                                                                                                             |                                   |                                   |                                    |                                   |                               |                                |                                      |
| African Region                                                                                                             | 4 (0.6)                           | 6 (0.7)                           | 3 (0.1)                            | 1 (0.1)                           | 0                             | 0                              | 14 (0.3)                             |
| Eastern Mediterr. Region                                                                                                   | 19 (2.6)                          | 17 (2)                            | 27 (1.2)                           | 7 (0.7)                           | 2 (3.2)                       | 0                              | 72 (1.4)                             |
| European Region                                                                                                            | 550 (76.2)                        | 679 (78.3)                        | 1769 (77)                          | 822 (80.8)                        | 35 (56.5)                     | 53 (67.1)                      | 3908 (77.5)                          |
| North American Region                                                                                                      | 102 (14.1)                        | 106 (12.2)                        | 343 (14.9)                         | 128 (12.6)                        | 24 (38.7)                     | 25 (31.6)                      | 728 (14.4)                           |
| South American Region                                                                                                      | 29 (4.0)                          | 38 (4.4)                          | 146 (6.4)                          | 53 (5.2)                          | 1 (1.6)                       | 0                              | 267 (5.3)                            |
| South-East Asian Region                                                                                                    | 5 (0.7)                           | 11 (1.3)                          | 3 (0.1)                            | 1 (0.1)                           | 0                             | 1 (1.3)                        | 21 (0.4)                             |
| Western Pacific Region                                                                                                     | 13 (1.8)                          | 10 (1.2)                          | 7 (0.3)                            | 5 (0.5)                           | 0                             | 0                              | 35 (0.7)                             |
| <b>Time period</b>                                                                                                         |                                   |                                   |                                    |                                   |                               |                                |                                      |
| Until June 15, 2020                                                                                                        | 253 (35.0)                        | 304 (35.1)                        | 756 (32.9)                         | 357 (35.1)                        | 20 (32.3)                     | 35 (44.3)                      | 1725 (34.2)                          |
| June 16 to Dec 31, 2020                                                                                                    | 297 (41.1)                        | 367 (42.3)                        | 1073 (46.7)                        | 469 (46.1)                        | 27 (43.5)                     | 30 (38)                        | 2263 (44.9)                          |
| January 1, 2021 or later                                                                                                   | 172 (23.8)                        | 196 (22.6)                        | 469 (20.4)                         | 191 (18.8)                        | 15 (24.2)                     | 14 (17.7)                      | 1057 (21)                            |
| <b>Immune-mediated inflammatory diseases</b>                                                                               |                                   |                                   |                                    |                                   |                               |                                |                                      |
| SpA                                                                                                                        | 309 (42.8)                        | 164 (18.9)                        | 1176 (51.2)                        | 171 (16.8)                        | 11 (17.7)                     | 0                              | 1831 (36.3)                          |
| PsA                                                                                                                        | 234 (32.4)                        | 607 (70.0)                        | 895 (38.9)                         | 446 (43.9)                        | 51 (82.3)                     | 60 (75.9)                      | 2293 (45.5)                          |
| Psoriasis (no arthritis)                                                                                                   | 179 (24.8)                        | 96 (11.1)                         | 227 (9.9)                          | 400 (39.3)                        | 0                             | 19 (24.1)                      | 921 (18.3)                           |
| <b>Disease activity</b>                                                                                                    |                                   |                                   |                                    |                                   |                               |                                |                                      |
|                                                                                                                            | N=606<br>(NA=116)                 | N=762<br>(NA=105)                 | N=1821<br>(NA=477)                 | N=918<br>(NA=99)                  | N=49<br>(NA=13)               | N=77<br>(NA=2)                 | N=4233<br>(NA=812)                   |
| Remission, min./low DA                                                                                                     | 432 (71.3)                        | 625 (82)                          | 1567 (86.1)                        | 782 (85.2)                        | 32 (65.3)                     | 62 (80.5)                      | 3500 (82.7)                          |
| Moderate, sev./high DA                                                                                                     | 174 (28.7)                        | 137 (18)                          | 254 (13.9)                         | 136 (14.8)                        | 17 (34.7)                     | 15 (19.5)                      | 733 (17.3)                           |
| <b>Ordinal outcome</b>                                                                                                     |                                   |                                   |                                    |                                   |                               |                                |                                      |
| Not hospitalized/dead                                                                                                      | 573 (79.4)                        | 654 (75.4)                        | 2026 (88.2)                        | 864 (85)                          | 45 (72.6)                     | 58 (73.4)                      | 4220 (83.7)                          |
| Hospitalized, no death                                                                                                     | 128 (17.7)                        | 186 (21.5)                        | 248 (10.8)                         | 146 (14.4)                        | 10 (16.1)                     | 18 (22.8)                      | 736 (14.6)                           |
| Death                                                                                                                      | 21 (2.9)                          | 27 (3.1)                          | 24 (1)                             | 7 (0.7)                           | 7 (11.3)                      | 3 (3.8)                        | 89 (1.8)                             |
| <b>Comorbidities</b>                                                                                                       |                                   |                                   |                                    |                                   |                               |                                |                                      |
|                                                                                                                            | N=714<br>(NA=8)                   | N=854<br>(NA=13)                  | N=2281<br>(NA=17)                  | N=1008<br>(NA=9)                  | N=62<br>(NA=0)                | N=77<br>(NA=2)                 | N=4996<br>(NA=49)                    |

|                          |                                  |                                  |                                    |                                  |                               |                               |                                     |
|--------------------------|----------------------------------|----------------------------------|------------------------------------|----------------------------------|-------------------------------|-------------------------------|-------------------------------------|
| Hypertension             | 183 (25.6)                       | 263 (30.8)                       | 555 (24.3)                         | 285 (28.3)                       | 13 (21.0)                     | 24 (31.2)                     | 1323 (26.5)                         |
| Cardiovascular disease   | 56 (7.8)                         | 84 (9.8)                         | 109 (4.8)                          | 81 (8.0)                         | 0                             | 8 (10.4)                      | 338 (6.8)                           |
| COPD or asthma           | 52 (7.3)                         | 58 (6.8)                         | 130 (5.7)                          | 102 (10.1)                       | 12 (19.4)                     | 7 (9.1)                       | 361 (7.2)                           |
| Other lung disease       | 15 (2.1)                         | 13 (1.5)                         | 37 (1.6)                           | 27 (2.7)                         | 4 (6.5)                       | 3 (3.9)                       | 99 (2.0)                            |
| Chronic kidney disease   | 14 (2.0)                         | 23 (2.7)                         | 36 (1.6)                           | 23 (2.3)                         | 1 (1.6)                       | 4 (5.2)                       | 101 (2.0)                           |
| Obesity (BMI >= 30)      | 137 (19.2)                       | 171 (20.0)                       | 426 (18.7)                         | 289 (28.7)                       | 12 (19.4)                     | 18 (23.4)                     | 562 (11.2)                          |
| Diabetes                 | 81 (11.3)                        | 104 (12.2)                       | 227 (10.0)                         | 133 (13.2)                       | 7 (11.3)                      | 10 (13.0)                     | 115 (2.3)                           |
| Cancer                   | 31 (4.3)                         | 24 (2.8)                         | 20 (0.9)                           | 28 (2.8)                         | 1 (1.6)                       | 11 (14.3)                     | 1053 (21.1)                         |
| number of comorbidities  | 0.8 (1.1)                        | 0.9 (1.2)                        | 0.7 (1.0)                          | 1 (1.3)                          | 0.8 (1.0)                     | 1.3 (1.4)                     | 0.8 (1.1)                           |
| No comorbidity           | 371 (52.0)                       | 436 (51.1)                       | 1313 (57.6)                        | 461 (45.7)                       | 33 (53.2)                     | 29 (37.7)                     | 2643 (52.9)                         |
| One comorbidity          | 187 (26.2)                       | 224 (26.2)                       | 524 (23)                           | 271 (26.9)                       | 14 (22.6)                     | 19 (24.7)                     | 1239 (24.8)                         |
| Two comorbidities        | 98 (13.7)                        | 107 (12.5)                       | 281 (12.3)                         | 144 (14.3)                       | 12 (19.4)                     | 16 (20.8)                     | 658 (13.2)                          |
| ≥ 3 comorbidities        | 58 (8.1)                         | 87 (10.2)                        | 163 (7.1)                          | 132 (13.1)                       | 3 (4.8)                       | 13 (16.9)                     | 456 (9.1)                           |
|                          |                                  |                                  |                                    |                                  |                               |                               |                                     |
| <b>csDMARD therapy</b>   |                                  |                                  |                                    |                                  |                               |                               |                                     |
| csDMARDs                 | 0                                | 867 (100)                        | 487 (21.2)                         | 138 (13.6)                       | 22 (35.5)                     | 14 (17.7)                     | 1528 (30.3)                         |
| Methotrexate             | 0                                | 649 (74.9)                       | 388 (16.9)                         | 119 (11.7)                       | 18 (29.0)                     | 9 (11.4)                      | 1183 (23.4)                         |
| Leflunomide              | 0                                | 64 (7.4)                         | 30 (1.3)                           | 7 (0.7)                          | 3 (4.8)                       | 3 (3.8)                       | 107 (2.1)                           |
| Sulfasalazine            | 0                                | 181 (20.9)                       | 86 (3.7)                           | 12 (1.2)                         | 3 (4.8)                       | 1 (1.3)                       | 283 (5.6)                           |
| Antimalarials            | 0                                | 27 (3.1)                         | 8 (0.4)                            | 1 (0.1)                          | 0                             | 1 (1.3)                       | 37 (0.7)                            |
| Cyclosporine             | 0                                | 14 (1.6)                         | 2 (0.1)                            | 3 (0.3)                          | 0                             | 0                             | 19 (0.4)                            |
|                          |                                  |                                  |                                    |                                  |                               |                               |                                     |
| <b>Further therapies</b> |                                  |                                  |                                    |                                  |                               |                               |                                     |
| Glucocorticoids (#)      | 52 (7.4)<br>(N=698)<br>(NA=24)   | 112 (13.1)<br>(N=858)<br>(NA=9)  | 121 (5.4)<br>(N=2229)<br>(NA=69)   | 57 (5.7)<br>(N=1004)<br>(NA=13)  | 12 (20.7)<br>(N=58)<br>(NA=4) | 3 (3.9)<br>(N=76)<br>(NA=3)   | 357 (7.3)<br>(N=4923)<br>(NA=122)   |
| 0 mg/d < GCs <= 7.5 mg/d | 31 (4.5)<br>(N=691)<br>(NA=31)   | 73 (8.6)<br>(N=847)<br>(NA=20)   | 75 (3.4)<br>(N=2198)<br>(NA=100)   | 38 (3.8)<br>(N=991)<br>(NA=26)   | 5 (9.1)<br>(N=55)<br>(NA=7)   | 2 (2.6)<br>(N=76)<br>(NA=3)   | 224 (4.6)<br>(N=4858)<br>(NA=187)   |
| GCs > 7.5 mg/d           | 14 (2.0)<br>(N=691)<br>(NA=31)   | 27 (3.2)<br>(N=847)<br>(NA=20)   | 14 (0.6)<br>(N=2198)<br>(NA=100)   | 6 (0.6)<br>(N=991)<br>(NA=26)    | 4 (7.3)<br>(N=55)<br>(NA=7)   | 1 (1.3)<br>(N=76)<br>(NA=3)   | 66 (1.4)<br>(N=4858)<br>(NA=187)    |
| NSAIDs                   | 214 (31.9)<br>(N=671)<br>(NA=51) | 199 (24.8)<br>(N=802)<br>(NA=65) | 480 (23.9)<br>(N=2012)<br>(NA=286) | 175 (18.2)<br>(N=961)<br>(NA=56) | 14 (25.0)<br>(N=56)<br>(NA=6) | 15 (20.8)<br>(N=72)<br>(NA=7) | 1097 (24.0)<br>(N=4574)<br>(NA=471) |
| Acitretin                | 25 (3.5)                         | 1 (0.1)                          | 2 (0.1)                            | 0                                | 1 (1.6)                       | 0                             | 29 (0.6)                            |
|                          |                                  |                                  |                                    |                                  |                               |                               |                                     |

Data are N (column %) for categorical variables or mean (SD) for continuous variables. Table includes patients diagnosed with psoriasis, psoriatic arthritis or axial spondyloarthritis, with a non-missing ordinal outcome and non-missing values for age, sex, and disease-modifying anti-rheumatic drugs (DMARDs). Further, patients receiving DMARDs not typical for the three diagnoses were excluded, as well as patients with some additional rheumatic diseases (529 patients excluded in total). Data refers to patients with non-missing values for the respective variable; total N for patients with non-missing values is given in parentheses for variables with missing values; the total number of missing values is also given in parenthesis, for the applicable variables. (#) Includes patients with a missing glucocorticoid dosage.

bDMARD, biological disease-modifying anti-rheumatic drugs; BMI, body mass index; csDMARD, conventional synthetic disease-modifying anti-rheumatic drugs; DMARD, disease-modifying anti-rheumatic drugs; IL, interleukin; JAK, Janus kinase; N, number; NSAID, non-steroidal anti-inflammatory drugs; TNF; tumour necrosis factor; tsDMARD, targeted synthetic disease-modifying anti-rheumatic drugs.

| <b>Supplementary table 2.</b> Baseline characteristics of the study population (total, and stratified by COVID-19 outcome) |                                         |                                        |                                     |                                           |
|----------------------------------------------------------------------------------------------------------------------------|-----------------------------------------|----------------------------------------|-------------------------------------|-------------------------------------------|
| <b>Parameter</b>                                                                                                           | <b>Not hospitalised,<br/>no death</b>   | <b>Hospitalised,<br/>no death</b>      | <b>Death</b>                        | <b>Total</b>                              |
| <b>N</b>                                                                                                                   | <b>4220</b>                             | <b>736</b>                             | <b>89</b>                           | <b>5045</b>                               |
| <b>General</b>                                                                                                             |                                         |                                        |                                     |                                           |
| Age [years]                                                                                                                | 48.4 (12.8)                             | 57.3 (13.5)                            | 67.7 (13.3)                         | 50 (13.5)                                 |
| ≤ 30 years                                                                                                                 | 406 (9.6)                               | 15 (2)                                 | 0                                   | 421 (8.3)                                 |
| 31 – 50 years                                                                                                              | 1869 (44.3)                             | 207 (28.1)                             | 9 (10.1)                            | 2085 (41.3)                               |
| 51 – 65 years                                                                                                              | 1588 (37.6)                             | 317 (43.1)                             | 30 (33.7)                           | 1935 (38.4)                               |
| 66 - 75 years                                                                                                              | 297 (7)                                 | 129 (17.5)                             | 22 (24.7)                           | 448 (8.9)                                 |
| > 75 years                                                                                                                 | 60 (1.4)                                | 68 (9.2)                               | 28 (31.5)                           | 156 (3.1)                                 |
| Male sex                                                                                                                   | 2130 (50.5)                             | 419 (56.9)                             | 57 (64)                             | 2606 (51.7)                               |
| Ever smoker                                                                                                                | 999 (30.8)<br>(N=3246)<br>(Missing=974) | 194 (31.0)<br>(N=626)<br>(Missing=110) | 20 (30.8)<br>(N=65)<br>(Missing=24) | 1213 (30.8)<br>(N=3937)<br>(Missing=1108) |
| <b>Regions</b>                                                                                                             |                                         |                                        |                                     |                                           |
| African Region                                                                                                             | 9 (0.2)                                 | 5 (0.7)                                | 0                                   | 14 (0.3)                                  |
| Eastern Mediterranean Region                                                                                               | 59 (1.4)                                | 13 (1.8)                               | 0                                   | 72 (1.4)                                  |
| European Region                                                                                                            | 3300 (78.2)                             | 550 (74.7)                             | 58 (65.2)                           | 3908 (77.5)                               |
| North American Region                                                                                                      | 609 (14.4)                              | 98 (13.3)                              | 21 (23.6)                           | 728 (14.4)                                |
| South American Region                                                                                                      | 221 (5.2)                               | 36 (4.9)                               | 10 (11.2)                           | 267 (5.3)                                 |
| South-East Asian Region                                                                                                    | 8 (0.2)                                 | 13 (1.8)                               | 0                                   | 21 (0.4)                                  |
| Western Pacific Region                                                                                                     | 14 (0.3)                                | 21 (2.9)                               | 0                                   | 35 (0.7)                                  |
| <b>Pandemic time period</b>                                                                                                |                                         |                                        |                                     |                                           |
| Until June 15, 2020                                                                                                        | 1285 (30.5)                             | 395 (53.7)                             | 45 (50.6)                           | 1725 (34.2)                               |
| From June 16 to December 31, 2020                                                                                          | 2018 (47.8)                             | 217 (29.5)                             | 28 (31.5)                           | 2263 (44.9)                               |
| January 1, 2021, and later                                                                                                 | 917 (21.7)                              | 124 (16.8)                             | 16 (18)                             | 1057 (21)                                 |
| <b>Immune-mediated inflammatory disease</b>                                                                                |                                         |                                        |                                     |                                           |
| Axial spondyloarthritis                                                                                                    | 1576 (37.3)                             | 229 (31.1)                             | 26 (29.2)                           | 1831 (36.3)                               |
| Psoriatic arthritis                                                                                                        | 1850 (43.8)                             | 392 (53.3)                             | 51 (57.3)                           | 2293 (45.5)                               |
| Psoriasis (without arthritis)                                                                                              | 794 (18.8)                              | 115 (15.6)                             | 12 (13.5)                           | 921 (18.3)                                |
| <b>Disease activity</b>                                                                                                    |                                         |                                        |                                     |                                           |
|                                                                                                                            | N=3572<br>(Missing=648)                 | N=589<br>(Missing=147)                 | N=72<br>(Missing=17)                | N=4233<br>(Missing=812)                   |
| Remission/low disease activity                                                                                             | 2986 (83.6)                             | 458 (77.8)                             | 56 (77.8)                           | 3500 (82.7)                               |
| Moderate/high disease activity                                                                                             | 586 (16.4)                              | 131 (22.2)                             | 16 (22.2)                           | 733 (17.3)                                |
| <b>Comorbidities</b>                                                                                                       |                                         |                                        |                                     |                                           |
|                                                                                                                            | N=4178<br>(Missing=42)                  | N=730<br>(Missing=6)                   | N=88<br>(Missing=1)                 | N=4996<br>(Missing=49)                    |
| Hypertension                                                                                                               | 973 (23.3)                              | 302 (41.4)                             | 48 (54.5)                           | 1323 (26.5)                               |
| Cardiovascular disease                                                                                                     | 210 (5)                                 | 100 (13.7)                             | 28 (31.8)                           | 338 (6.8)                                 |
| COPD or asthma                                                                                                             | 254 (6.1)                               | 86 (11.8)                              | 21 (23.9)                           | 361 (7)                                   |
| Other chronic lung disease                                                                                                 | 54 (1.3)                                | 34 (4.7)                               | 11 (12.5)                           | 99 (2)                                    |
| Chronic kidney disease                                                                                                     | 46 (1.1)                                | 41 (5.6)                               | 14 (15.9)                           | 101 (2)                                   |
| Diabetes                                                                                                                   | 371 (8.9)                               | 162 (22.2)                             | 29 (33)                             | 562 (11.2)                                |
| Cancer                                                                                                                     | 70 (1.7)                                | 36 (4.9)                               | 9 (10.2)                            | 115 (2.3)                                 |
| Obesity                                                                                                                    | 830 (19.9)                              | 198 (27.1)                             | 25 (28.4)                           | 1053 (21.1)                               |
| Number of comorbidities                                                                                                    | 0.7 (1)                                 | 1.4 (1.4)                              | 2.3 (1.8)                           | 0.8 (1.1)                                 |
| No comorbidity                                                                                                             | 2397 (57.4)                             | 230 (31.5)                             | 16 (18.2)                           | 2643 (52.9)                               |
| One comorbidity                                                                                                            | 1004 (24)                               | 217 (29.7)                             | 18 (20.5)                           | 1239 (24.8)                               |
| Two comorbidities                                                                                                          | 494 (11.8)                              | 146 (20)                               | 18 (20.5)                           | 658 (13.2)                                |
| ≥ 3 comorbidities                                                                                                          | 283 (6.8)                               | 137 (18.8)                             | 36 (40.9)                           | 456 (9.1)                                 |
| <b>DMARDs</b>                                                                                                              |                                         |                                        |                                     |                                           |

|                                             |                                         |                                       |                                     |                                        |
|---------------------------------------------|-----------------------------------------|---------------------------------------|-------------------------------------|----------------------------------------|
| <b>(monotherapy or combination therapy)</b> |                                         |                                       |                                     |                                        |
| csDMARDs                                    | 1185 (28.1)                             | 309 (42)                              | 34 (38.2)                           | 1528 (30.3)                            |
| Antimalarials                               | 30 (0.7)                                | 7 (1)                                 | 0                                   | 37 (0.7)                               |
| Methotrexate                                | 915 (21.7)                              | 246 (33.4)                            | 22 (24.7)                           | 1183 (23.4)                            |
| Leflunomide                                 | 82 (1.9)                                | 22 (3)                                | 3 (3.4)                             | 107 (2.1)                              |
| Sulfasalazine                               | 210 (5)                                 | 60 (8.2)                              | 13 (14.6)                           | 283 (5.6)                              |
| Cyclosporine                                | 18 (0.4)                                | 1 (0.1)                               | 0                                   | 19 (0.4)                               |
| bDMARDs                                     | 2890 (68.5)                             | 394 (53.5)                            | 31 (34.8)                           | 3315 (65.7)                            |
| TNF inhibitors                              | 2026 (48)                               | 248 (33.7)                            | 24 (27)                             | 2298 (45.6)                            |
| IL-17 inhibitors                            | 520 (12.3)                              | 88 (12)                               | 2 (2.2)                             | 610 (12.1)                             |
| IL-23/IL-12+23 inhibitors                   | 344 (8.2)                               | 58 (7.9)                              | 5 (5.6)                             | 407 (8.1)                              |
| tsDMARDs                                    | 103 (2.4)                               | 28 (3.8)                              | 10 (11.2)                           | 141 (2.8)                              |
| JAK inhibitors                              | 45 (1.1)                                | 10 (1.4)                              | 7 (7.9)                             | 62 (1.2)                               |
| Apremilast                                  | 58 (1.4)                                | 18 (2.4)                              | 3 (3.4)                             | 79 (1.6)                               |
|                                             |                                         |                                       |                                     |                                        |
| <b>No DMARD treatment</b>                   | 573 (13.6)                              | 128 (17.4)                            | 21 (23.6)                           | 722 (14.3)                             |
|                                             |                                         |                                       |                                     |                                        |
| <b>Other therapies</b>                      |                                         |                                       |                                     |                                        |
| Glucocorticoids (#)                         | 251 (6.1)<br>(N=4116)<br>(Missing=104)  | 89 (12.3)<br>(N=722)<br>(Missing=14)  | 17 (20)<br>(N=85)<br>(Missing=4)    | 357 (7.3)<br>(N=4923)<br>(Missing=122) |
| 0 mg/d < Glucocorticoids <= 7.5 mg/d        | 165 (4)<br>(N=4078)<br>(Missing=142)    | 48 (6.9)<br>(N=697)<br>(Missing=39)   | 11 (13.3)<br>(N=83)<br>(Missing=6)  | 224 (4.6)<br>(N=4858)<br>(Missing=187) |
| Glucocorticoids > 7.5 mg/d                  | 46 (1.1)<br>(N=4078)<br>(Missing=142)   | 16 (2.3)<br>(N=697)<br>(Missing=39)   | 4 (4.8)<br>(N=83)<br>(Missing=6)    | 66 (1.4)<br>(N=4858)<br>(Missing=187)  |
| NSAIDs                                      | 948 (24.8)<br>(N=3824)<br>(Missing=396) | 137 (20.3)<br>(N=674)<br>(Missing=62) | 12 (15.8)<br>(N=76)<br>(Missing=13) | 1097 (24)<br>(N=4574)<br>(Missing=471) |
| Acitretin                                   | 22 (0.5)                                | 5 (0.7)                               | 2 (2.2)                             | 29 (0.6)                               |

Data are N (column %) for categorical variables or mean (SD) for continuous variables. Data refers to patients with non-missing values for the respective variable; total N for patients with non-missing values is given in parentheses for variables with missing values; the total number of missing values is also given in parenthesis, for the applicable variables. (#) Includes patients with a missing glucocorticoid dosage.

bDMARD, biological disease-modifying anti-rheumatic drugs; BMI, body mass index; csDMARD, conventional synthetic disease-modifying anti-rheumatic drugs; DMARD, disease-modifying anti-rheumatic drugs; IL, interleukin; JAK, Janus kinase; N, number; NSAID, non-steroidal anti-inflammatory drugs; TNF; tumour necrosis factor; tsDMARD, targeted synthetic disease-modifying anti-rheumatic drugs.

| <b>Supplementary Table 3.</b> Multivariable ordinal logistic regression analysis of factors associated with COVID-19 severity, stratified by IMID (PsA, axSpA and PsO) |                                                     |             |             |             |                                                     |             |             |             |                                                     |             |             |             |
|------------------------------------------------------------------------------------------------------------------------------------------------------------------------|-----------------------------------------------------|-------------|-------------|-------------|-----------------------------------------------------|-------------|-------------|-------------|-----------------------------------------------------|-------------|-------------|-------------|
|                                                                                                                                                                        | Psoriatic arthritis                                 |             |             |             | Axial spondyloarthritis                             |             |             |             | Psoriasis (without arthritis)                       |             |             |             |
| <b>N total</b>                                                                                                                                                         | <b>2293</b>                                         |             |             |             | <b>1818</b>                                         |             |             |             | <b>912</b>                                          |             |             |             |
| <b>N deaths / hospitalizations without death / other</b>                                                                                                               | <b>51 / 392 / 1850</b>                              |             |             |             | <b>26 / 229 / 1563</b>                              |             |             |             | <b>12 / 115 / 785</b>                               |             |             |             |
|                                                                                                                                                                        | N deaths / hospitalizations without death / neither | OR          | 95% CI      |             | N deaths / hospitalizations without death / neither | OR          | 95% CI      |             | N deaths / hospitalizations without death / neither | OR          | 95% CI      |             |
| Male sex (vs. female)                                                                                                                                                  | 26 / 205 / 822                                      | <b>1.50</b> | <b>1.18</b> | <b>1.91</b> | 21 / 132 / 837                                      | <b>1.41</b> | <b>1.04</b> | <b>1.93</b> | 10 / 82 / 458                                       | <b>2.12</b> | <b>1.32</b> | <b>3.42</b> |
| Pandemic time period                                                                                                                                                   |                                                     |             |             |             |                                                     |             |             |             |                                                     |             |             |             |
| Until June 15 <sup>th</sup> , 2020                                                                                                                                     | 24 / 207 / 513                                      | 1           | [Reference] |             | 13 / 123 / 423                                      | 1           | [Reference] |             | 8 / 65 / 338                                        | 1           | [Reference] |             |
| June 16, 2020 – December 31, 2020                                                                                                                                      | 16 / 117 / 910                                      | <b>0.41</b> | <b>0.31</b> | <b>0.55</b> | 11 / 71 / 792                                       | <b>0.36</b> | <b>0.26</b> | <b>0.52</b> | 1 / 29 / 308                                        | <b>0.52</b> | <b>0.31</b> | <b>0.88</b> |
| January 1, 2021, and later                                                                                                                                             | 11 / 68 / 427                                       | <b>0.53</b> | <b>0.37</b> | <b>0.75</b> | 2 / 35 / 348                                        | <b>0.35</b> | <b>0.22</b> | <b>0.56</b> | 3 / 21 / 139                                        | 0.89        | 0.49        | 1.63        |
| Comorbidities                                                                                                                                                          |                                                     |             |             |             |                                                     |             |             |             |                                                     |             |             |             |
| Hypertension alone (vs. no hypertension, no CVD)                                                                                                                       | 18 / 141 / 466                                      | 1.06        | 0.79        | 1.41        | 8 / 68 / 255                                        | <b>1.49</b> | <b>1.01</b> | <b>2.19</b> | 2 / 34 / 120                                        | 1.69        | 0.97        | 2.95        |
| CVD alone (vs. no hypertension, no CVD)                                                                                                                                | 2 / 18 / 31                                         | 1.46        | 0.76        | 2.83        | 3 / 11 / 22                                         | <b>2.77</b> | <b>1.25</b> | <b>6.13</b> | 2 / 9 / 22                                          | 1.71        | 0.67        | 4.36        |
| CVD and hypertension (vs. no hypertension, no CVD)                                                                                                                     | 11 / 37 / 81                                        | 1.07        | 0.66        | 1.74        | 5 / 15 / 33                                         | 1.72        | 0.82        | 3.62        | 5 / 11 / 22                                         | 2.00        | 0.83        | 4.83        |
| COPD or asthma                                                                                                                                                         | 14 / 49 / 124                                       | <b>1.95</b> | <b>1.34</b> | <b>2.82</b> | 5 / 23 / 86                                         | 1.40        | 0.81        | 2.40        | 2 / 14 / 46                                         | 2.02        | 0.94        | 4.35        |
| Other chronic lung disease                                                                                                                                             | 3 / 21 / 23                                         | <b>2.41</b> | <b>1.28</b> | <b>4.55</b> | 5 / 7 / 18                                          | <b>2.75</b> | <b>1.18</b> | <b>6.40</b> | 3 / 6 / 13                                          | <b>2.94</b> | <b>1.11</b> | <b>7.78</b> |
| Chronic kidney disease                                                                                                                                                 | 9 / 26 / 26                                         | <b>2.56</b> | <b>1.46</b> | <b>4.48</b> | 3 / 11 / 10                                         | <b>3.04</b> | <b>1.22</b> | <b>7.54</b> | 2 / 5 / 10                                          | 1.10        | 0.34        | 3.54        |
| Obesity alone (vs. no obesity, no diabetes)                                                                                                                            | 9 / 75 / 306                                        | <b>1.40</b> | <b>1.02</b> | <b>1.94</b> | 1 / 33 / 189                                        | 1.37        | 0.87        | 2.15        | 1 / 30 / 175                                        | 1.31        | 0.77        | 2.26        |
| Diabetes mellitus alone (vs. no obesity, no diabetes)                                                                                                                  | 6 / 60 / 115                                        | <b>1.85</b> | <b>1.25</b> | <b>2.74</b> | 5 / 23 / 60                                         | 1.54        | 0.88        | 2.70        | 4 / 19 / 36                                         | <b>3.33</b> | <b>1.68</b> | <b>6.61</b> |

|                                                                                   |                 |             |             |             |                 |             |             |             |              |             |             |             |
|-----------------------------------------------------------------------------------|-----------------|-------------|-------------|-------------|-----------------|-------------|-------------|-------------|--------------|-------------|-------------|-------------|
| Obesity and diabetes mellitus (vs. no obesity, no diabetes)                       | 10 / 35 / 93    | <b>1.85</b> | <b>1.18</b> | <b>2.92</b> | 3 / 9 / 27      | 1.82        | 0.79        | 4.21        | 1 / 17 / 42  | 2.00        | 0.93        | 4.30        |
| Cancer and known smoking habits (vs. no cancer, never smoked)                     | 2 / 19 / 30     | 1.20        | 0.62        | 2.33        | 0 / 4 / 11      | 1.01        | 0.26        | 3.89        | 2 / 6 / 16   | 1.28        | 0.45        | 3.60        |
| Cancer and unknown smoking habits (vs. no cancer, never smoked)                   | 2 / 4 / 8       | 2.74        | 0.86        | 8.74        | 3 / 3 / 5       | 2.42        | 0.59        | 9.92        |              | n.a.        |             |             |
| No cancer and ever smoked or unknown smoking habits (vs. no cancer, never smoked) | 24 / 155 / 934  | 0.83        | 0.63        | 1.09        | 11 / 83 / 716   | 0.88        | 0.59        | 1.32        | 3 / 43 / 272 | 0.98        |             |             |
| Medication                                                                        |                 |             |             |             |                 |             |             |             |              |             |             |             |
| No DMARD therapy                                                                  | 8 / 49 / 177    | 1           | [Reference] |             | 8 / 47 / 254    | 1           | [Reference] |             | 5 / 32 / 141 | 1           | [Reference] |             |
| Antimalarials                                                                     | 0 / 3 / 12      | 0.78        | 0.17        | 3.45        | 0 / 1 / 2       | 1.96        | 0.13        | 30.73       |              | n.a.        |             |             |
| Methotrexate                                                                      | 11 / 101 / 342  | 0.97        | 0.64        | 1.47        | 2 / 14 / 35     | 1.70        | 0.80        | 3.61        | 0 / 18 / 72  | 0.77        | 0.37        | 1.58        |
| Leflunomide                                                                       | 2 / 16 / 36     | 1.24        | 0.60        | 2.59        |                 | n.a.        |             |             |              | n.a.        |             |             |
| Sulfasalazine                                                                     | 7 / 15 / 54     | 1.86        | 0.98        | 3.54        | 5 / 17 / 82     | 1.25        | 0.66        | 2.37        |              |             |             |             |
| Cyclosporine                                                                      | 0 / 1 / 10      | 0.61        | 0.07        | 5.13        |                 | n.a.        |             |             |              |             |             |             |
| TNF inhibitors                                                                    | 11 / 104 / 780  | <b>0.47</b> | <b>0.32</b> | <b>0.71</b> | 10 / 128 / 1038 | 0.75        | 0.49        | 1.13        | 3 / 16 / 207 | <b>0.38</b> | <b>0.19</b> | <b>0.75</b> |
| IL-17 inhibitors                                                                  | 1 / 49 / 251    | <b>0.56</b> | <b>0.34</b> | <b>0.90</b> | 1 / 21 / 142    | 0.71        | 0.38        | 1.33        | 0 / 18 / 127 | 0.53        | 0.25        | 1.12        |
| IL-23/IL-12+23 inhibitors                                                         | 3 / 31 / 111    | 0.76        | 0.43        | 1.34        |                 | n.a.        |             |             | 2 / 27 / 225 | <b>0.43</b> | <b>0.23</b> | <b>0.82</b> |
| JAK inhibitors                                                                    | 7 / 9 / 35      | 1.65        | 0.80        | 3.42        | 0 / 1 / 10      | 0.52        | 0.06        | 4.72        |              | n.a.        |             |             |
| Apremilast                                                                        | 1 / 14 / 45     | 0.91        | 0.43        | 1.91        |                 | n.a.        |             |             | 2 / 4 / 13   | 1.14        | 0.34        | 3.76        |
| Disease activity (DA) and glucocorticoids (GCs)                                   |                 |             |             |             |                 |             |             |             |              |             |             |             |
| Remission/low DA, no GCs                                                          | 30 / 273 / 1431 | 1           | [Reference] |             | 18 / 159 / 1274 | 1           | [Reference] |             | 9 / 83 / 64  | 1           | [Reference] |             |
| Remission/low DA, GCs                                                             | 9 / 35 / 121    | <b>1.63</b> | <b>1.02</b> | <b>2.59</b> | 4 / 21 / 53     | <b>2.54</b> | <b>1.41</b> | <b>4.57</b> | 0 / 2 / 3    | 2.18        | 0.24        | 20.25       |
| Moderate/high DA, no GCs                                                          | 8 / 63 / 241    | <b>1.44</b> | <b>1.01</b> | <b>2.04</b> | 3 / 37 / 213    | 1.60        | 0.99        | 2.59        | 3 / 30 / 141 | 1.11        | 0.65        | 1.90        |

|                       |              |             |             |             |              |             |             |             |            |      |      |      |
|-----------------------|--------------|-------------|-------------|-------------|--------------|-------------|-------------|-------------|------------|------|------|------|
| Moderate/high DA, GCs | 4 / 21 / 57  | <b>2.02</b> | <b>1.12</b> | <b>3.64</b> | 2 / 11 / 23  | <b>2.85</b> | <b>1.25</b> | <b>6.52</b> |            | n.a. |      |      |
| NSAIDs                | 8 / 75 / 479 | 0.75        | 0.55        | 1.02        | 6 / 69 / 565 | 0.72        | 0.48        | 1.09        | 2 / 7 / 23 | 1.69 | 0.65 | 4.40 |

Results for ordinal mixed effects logistic regression analysis in patients with specific disease entities. Shown are fixed effects, random effects for country are not shown. Missing values are imputed via multiple imputation, patient numbers may thus be rounded. The model was additionally adjusted for age employing five-knot restricted cubic splines. Significant associations highlighted in bold.

axSpA, axial spondyloarthritis; bDMARD, biological disease-modifying anti-rheumatic drugs; BMI, body mass index; csDMARD, conventional synthetic disease-modifying anti-rheumatic drugs; DMARD, disease-modifying anti-rheumatic drugs; IL, interleukin; JAK, Janus kinase; N, number; NSAID, non-steroidal anti-inflammatory drugs; PsA, psoriatic arthritis; PsO, psoriasis without arthritis; TNF; tumour necrosis factor; tsDMARD, targeted synthetic disease-modifying anti-rheumatic drugs.

| <b>Supplementary Table 4.</b> Sensitivity analysis – Multivariable ordinal logistic regression analysis of factors associated with COVID-19 severity (confirmed cases) |                                          |             |               |             |
|------------------------------------------------------------------------------------------------------------------------------------------------------------------------|------------------------------------------|-------------|---------------|-------------|
| <b>N deaths/hospitalisations/neither</b>                                                                                                                               | <b>75 / 680 / 3421</b>                   |             |               |             |
|                                                                                                                                                                        | <b>N deaths/hospitalizations/neither</b> | <b>OR</b>   | <b>95% CI</b> |             |
| Male sex (vs. female)                                                                                                                                                  | 47 / 387 / 1733                          | <b>1.48</b> | <b>1.23</b>   | <b>1.78</b> |
| Pandemic time period                                                                                                                                                   |                                          |             |               |             |
| Until June 15 <sup>th</sup> , 2020                                                                                                                                     | 36 / 361 / 739                           | 1           | [Reference]   |             |
| June 16, 2020 – December 31, 2020                                                                                                                                      | 24 / 203 / 1858                          | <b>0.28</b> | <b>0.23</b>   | <b>0.35</b> |
| January 1, 2021, and later                                                                                                                                             | 15 / 116 / 824                           | <b>0.36</b> | <b>0.28</b>   | <b>0.47</b> |
| Comorbidities                                                                                                                                                          |                                          |             |               |             |
| Hypertension alone (vs. no hypertension, no CVD)                                                                                                                       | 21 / 228 / 678                           | <b>1.32</b> | <b>1.05</b>   | <b>1.66</b> |
| CVD alone (vs. no hypertension, no CVD)                                                                                                                                | 6 / 35 / 62                              | <b>1.84</b> | <b>1.14</b>   | <b>2.97</b> |
| CVD and hypertension (vs. no hypertension, no CVD)                                                                                                                     | 18 / 55 / 117                            | 1.28        | 0.86          | 1.90        |
| COPD or asthma                                                                                                                                                         | 19 / 78 / 202                            | <b>1.83</b> | <b>1.35</b>   | <b>2.47</b> |
| Other chronic lung disease                                                                                                                                             | 10 / 34 / 47                             | <b>2.35</b> | <b>1.48</b>   | <b>3.74</b> |
| Chronic kidney disease                                                                                                                                                 | 11 / 38 / 36                             | <b>2.39</b> | <b>1.48</b>   | <b>3.87</b> |
| Obesity alone (vs. no obesity, no diabetes)                                                                                                                            | 9 / 130 / 554                            | <b>1.36</b> | <b>1.06</b>   | <b>1.74</b> |
| Diabetes mellitus alone (vs. no obesity, no diabetes)                                                                                                                  | 14 / 97 / 171                            | <b>1.91</b> | <b>1.40</b>   | <b>2.60</b> |
| Obesity and diabetes mellitus (vs. no obesity, no diabetes)                                                                                                            | 10 / 53 / 135                            | <b>1.65</b> | <b>1.13</b>   | <b>2.42</b> |
| Cancer and known smoking habits (vs. no cancer, never smoked)                                                                                                          | 3 / 28 / 47                              | 1.09        | 0.63          | 1.88        |
| Cancer and unknown smoking habits (vs. no cancer, never smoked)                                                                                                        | 4 / 6 / 11                               | <b>2.80</b> | <b>1.04</b>   | <b>7.51</b> |
| No cancer and ever smoked or unknown smoking habits (vs. no cancer, never smoked)                                                                                      | 32 / 256 / 1662                          | 0.84        | 0.67          | 1.04        |
| Rheumatic disease                                                                                                                                                      |                                          |             |               |             |
| Psoriatic arthritis                                                                                                                                                    | 43 / 354 / 1535                          | 1           | [Reference]   |             |
| Axial spondyloarthritis                                                                                                                                                | 21 / 215 / 1308                          | 1.08        | 0.86          | 1.36        |
| Psoriasis (without arthritis)                                                                                                                                          | 11 / 111 / 578                           | <b>0.55</b> | <b>0.41</b>   | <b>0.74</b> |
| Medication                                                                                                                                                             |                                          |             |               |             |
| No DMARD therapy                                                                                                                                                       | 20 / 124 / 492                           | 1           | [Reference]   |             |
| Antimalarials                                                                                                                                                          | 0 / 4 / 13                               | 1.09        | 0.29          | 4.05        |
| Methotrexate                                                                                                                                                           | 12 / 122 / 371                           | 1.00        | 0.73          | 1.39        |
| Leflunomide                                                                                                                                                            | 1 / 13 / 36                              | 0.79        | 0.37          | 1.72        |
| Sulfasalazine                                                                                                                                                          | 10 / 32 / 113                            | 1.54        | 0.97          | 2.44        |
| Cyclosporine                                                                                                                                                           | 0 / 1 / 12                               | 0.41        | 0.05          | 3.46        |
| TNF inhibitors                                                                                                                                                         | 18 / 226 / 1628                          | <b>0.60</b> | <b>0.46</b>   | <b>0.79</b> |
| IL-17 inhibitors                                                                                                                                                       | 1 / 80 / 412                             | <b>0.67</b> | <b>0.47</b>   | <b>0.96</b> |



|                                                                                                                                                                                                                                                                                                                                                                                                                                                                                                                                                                                                                                                                                                                                                                                                                                         |                 |             |             |               |
|-----------------------------------------------------------------------------------------------------------------------------------------------------------------------------------------------------------------------------------------------------------------------------------------------------------------------------------------------------------------------------------------------------------------------------------------------------------------------------------------------------------------------------------------------------------------------------------------------------------------------------------------------------------------------------------------------------------------------------------------------------------------------------------------------------------------------------------------|-----------------|-------------|-------------|---------------|
| IL-23/IL-12+23 inhibitors                                                                                                                                                                                                                                                                                                                                                                                                                                                                                                                                                                                                                                                                                                                                                                                                               | 3 / 53 / 264    | <b>0.66</b> | <b>0.43</b> | <b>0.9999</b> |
| JAK inhibitors                                                                                                                                                                                                                                                                                                                                                                                                                                                                                                                                                                                                                                                                                                                                                                                                                          | 7 / 8 / 41      | 1.43        | 0.71        | 2.87          |
| Apremilast                                                                                                                                                                                                                                                                                                                                                                                                                                                                                                                                                                                                                                                                                                                                                                                                                              | 3 / 17 / 42     | 1.34        | 0.69        | 2.59          |
| Disease activity (DA) and glucocorticoids (GCs)                                                                                                                                                                                                                                                                                                                                                                                                                                                                                                                                                                                                                                                                                                                                                                                         |                 |             |             |               |
| Remission/low DA, no GCs                                                                                                                                                                                                                                                                                                                                                                                                                                                                                                                                                                                                                                                                                                                                                                                                                | 49 / 477 / 2748 | 1           | [Reference] |               |
| Remission/low DA, GCs                                                                                                                                                                                                                                                                                                                                                                                                                                                                                                                                                                                                                                                                                                                                                                                                                   | 10 / 57 / 156   | <b>1.78</b> | <b>1.22</b> | <b>2.60</b>   |
| Moderate/high DA, no GCs                                                                                                                                                                                                                                                                                                                                                                                                                                                                                                                                                                                                                                                                                                                                                                                                                | 12 / 119 / 449  | <b>1.46</b> | <b>1.12</b> | <b>1.90</b>   |
| Moderate/high DA, GCs                                                                                                                                                                                                                                                                                                                                                                                                                                                                                                                                                                                                                                                                                                                                                                                                                   | 4 / 27 / 68     | <b>1.81</b> | <b>1.06</b> | <b>3.08</b>   |
| NSAIDs                                                                                                                                                                                                                                                                                                                                                                                                                                                                                                                                                                                                                                                                                                                                                                                                                                  | 13 / 138 / 878  | <b>0.76</b> | <b>0.59</b> | <b>0.97</b>   |
| <p>Results for ordinal mixed effects logistic regression analysis in patients with a confirmed COVID-19 diagnosis. Shown are fixed effects, random effects for country are not shown. Missing values are imputed via multiple imputation, patient numbers may thus be rounded. The model was additionally adjusted for age employing four-knot restricted cubic splines. Significant associations highlighted in bold.</p> <p>bDMARD, biological disease-modifying anti-rheumatic drugs; BMI, body mass index; csDMARD, conventional synthetic disease-modifying anti-rheumatic drugs; DMARD, disease-modifying anti-rheumatic drugs; IL, interleukin; JAK, Janus kinase; N, number; NSAID, non-steroidal anti-inflammatory drugs; TNF, tumour necrosis factor; tsDMARD, targeted synthetic disease-modifying anti-rheumatic drugs.</p> |                 |             |             |               |

| <b>Supplementary Table 5.</b> Sensitivity analysis – Multivariable binary logistic regression analysis of factors associated with COVID-19 severity (outcome hospitalisation) |                                 |             |               |             |
|-------------------------------------------------------------------------------------------------------------------------------------------------------------------------------|---------------------------------|-------------|---------------|-------------|
| <b>N hospitalizations /other</b>                                                                                                                                              | <b>837 / 4220</b>               |             |               |             |
|                                                                                                                                                                               | <b>N hospitalizations/other</b> | <b>OR</b>   | <b>95% CI</b> |             |
| Male sex (vs. female)                                                                                                                                                         | 479 / 2130                      | <b>1.50</b> | <b>1.26</b>   | <b>1.79</b> |
| Pandemic time period                                                                                                                                                          |                                 |             |               |             |
| Until June 15 <sup>th</sup> , 2020                                                                                                                                            | 442 / 1285                      | 1           | [Reference]   |             |
| June 16, 2020 – December 31, 2020                                                                                                                                             | 250 / 2018                      | <b>0.40</b> | <b>0.33</b>   | <b>0.49</b> |
| January 1, 2021, and later                                                                                                                                                    | 145 / 917                       | <b>0.51</b> | <b>0.40</b>   | <b>0.66</b> |
| Comorbidities                                                                                                                                                                 |                                 |             |               |             |
| Hypertension alone (vs. no hypertension, no CVD)                                                                                                                              | 272 / 847                       | <b>1.31</b> | <b>1.05</b>   | <b>1.62</b> |
| CVD alone (vs. no hypertension, no CVD)                                                                                                                                       | 45 / 76                         | <b>1.92</b> | <b>1.22</b>   | <b>3.02</b> |
| CVD and hypertension (vs. no hypertension, no CVD)                                                                                                                            | 87 / 136                        | 1.36        | 0.93          | 1.98        |
| COPD or asthma                                                                                                                                                                | 111 / 257                       | <b>1.69</b> | <b>1.27</b>   | <b>2.25</b> |
| Other chronic lung disease                                                                                                                                                    | 45 / 55                         | <b>2.39</b> | <b>1.49</b>   | <b>3.82</b> |
| Chronic kidney disease                                                                                                                                                        | 58 / 46                         | <b>2.29</b> | <b>1.44</b>   | <b>3.66</b> |
| Obesity alone (vs. no obesity, no diabetes)                                                                                                                                   | 153 / 676                       | <b>1.38</b> | <b>1.09</b>   | <b>1.74</b> |
| Diabetes mellitus alone (vs. no obesity, no diabetes)                                                                                                                         | 117 / 212                       | <b>1.92</b> | <b>1.43</b>   | <b>2.58</b> |
| Obesity and diabetes mellitus (vs. no obesity, no diabetes)                                                                                                                   | 75 / 162                        | <b>1.75</b> | <b>1.22</b>   | <b>2.51</b> |
| Cancer and known smoking habits (vs. no cancer, never smoked)                                                                                                                 | 33 / 57                         | 1.19        | 0.70          | 2.02        |
| Cancer and unknown smoking habits (vs. no cancer, never smoked)                                                                                                               | 13 / 13                         | 2.06        | 0.80          | 5.33        |
| No cancer and ever smoked or unknown smoking habits (vs. no cancer, never smoked)                                                                                             | 330 / 1933                      | 0.87        | 0.71          | 1.06        |
| Rheumatic disease                                                                                                                                                             |                                 |             |               |             |
| Psoriatic arthritis                                                                                                                                                           | 450 / 1850                      | 1           | [Reference]   |             |
| Axial spondyloarthritis                                                                                                                                                       | 260 / 1576                      | 1.08        | 0.87          | 1.35        |
| Psoriasis (without arthritis)                                                                                                                                                 | 127 / 794                       | <b>0.47</b> | <b>0.36</b>   | <b>0.63</b> |
| Medication                                                                                                                                                                    |                                 |             |               |             |
| No DMARD therapy                                                                                                                                                              | 151 / 573                       | 1           | [Reference]   |             |
| Antimalarials                                                                                                                                                                 | 4 / 14                          | 1.20        | 0.33          | 4.39        |
| Methotrexate                                                                                                                                                                  | 49 / 449                        | 1.12        | 0.82          | 1.53        |
| Leflunomide                                                                                                                                                                   | 18 / 42                         | 1.13        | 0.56          | 2.27        |
| Sulfasalazine                                                                                                                                                                 | 44 / 136                        | 1.25        | 0.79          | 1.97        |
| Cyclosporine                                                                                                                                                                  | 1 / 18                          | 0.31        | 0.04          | 2.46        |
| TNF inhibitors                                                                                                                                                                | 278 / 2026                      | <b>0.59</b> | <b>0.46</b>   | <b>0.77</b> |
| IL-17 inhibitors                                                                                                                                                              | 91 / 520                        | <b>0.69</b> | <b>0.49</b>   | <b>0.96</b> |
| IL-23/IL-12+23 inhibitors                                                                                                                                                     | 63 / 344                        | 0.74        | 0.50          | 1.10        |

|                                                                                                                                                                                                                                                                                                                                                                                                                                                                                                                                                                                                                                                                                                                                                                                                                                            |            |             |             |             |
|--------------------------------------------------------------------------------------------------------------------------------------------------------------------------------------------------------------------------------------------------------------------------------------------------------------------------------------------------------------------------------------------------------------------------------------------------------------------------------------------------------------------------------------------------------------------------------------------------------------------------------------------------------------------------------------------------------------------------------------------------------------------------------------------------------------------------------------------|------------|-------------|-------------|-------------|
| JAK inhibitors                                                                                                                                                                                                                                                                                                                                                                                                                                                                                                                                                                                                                                                                                                                                                                                                                             | 17 / 45    | 1.34        | 0.68        | 2.65        |
| Apremilast                                                                                                                                                                                                                                                                                                                                                                                                                                                                                                                                                                                                                                                                                                                                                                                                                                 | 21 / 58    | 1.07        | 0.57        | 2.00        |
| Disease activity (DA) and glucocorticoids (GCs)                                                                                                                                                                                                                                                                                                                                                                                                                                                                                                                                                                                                                                                                                                                                                                                            |            |             |             |             |
| Remission/low DA, no GCs                                                                                                                                                                                                                                                                                                                                                                                                                                                                                                                                                                                                                                                                                                                                                                                                                   | 580 / 3358 | 1           | [Reference] |             |
| Remission/low DA, GCs                                                                                                                                                                                                                                                                                                                                                                                                                                                                                                                                                                                                                                                                                                                                                                                                                      | 74 / 177   | <b>1.97</b> | <b>1.38</b> | <b>2.82</b> |
| Moderate/high DA, no GCs                                                                                                                                                                                                                                                                                                                                                                                                                                                                                                                                                                                                                                                                                                                                                                                                                   | 145 / 504  | <b>1.36</b> | <b>1.07</b> | <b>1.74</b> |
| Moderate/high DA, GCs                                                                                                                                                                                                                                                                                                                                                                                                                                                                                                                                                                                                                                                                                                                                                                                                                      | 38 / 82    | <b>2.34</b> | <b>1.43</b> | <b>3.81</b> |
| NSAIDs                                                                                                                                                                                                                                                                                                                                                                                                                                                                                                                                                                                                                                                                                                                                                                                                                                     | 171 / 1072 | <b>0.78</b> | <b>0.61</b> | <b>0.99</b> |
| <p>Results for binary mixed effects logistic regression analysis in all patients, for the outcome of hospitalization. Shown are fixed effects, random effects for country are not shown. Missing values are imputed via multiple imputation, patient numbers may thus be rounded. The model was additionally adjusted for age employing four-knot restricted cubic splines. Significant associations highlighted in bold.</p> <p>bDMARD, biological disease-modifying anti-rheumatic drugs; BMI, body mass index; csDMARD, conventional synthetic disease-modifying anti-rheumatic drugs; DMARD, disease-modifying anti-rheumatic drugs; IL, interleukin; JAK, Janus kinase; N, number; NSAID, non-steroidal anti-inflammatory drugs; TNF; tumour necrosis factor; tsDMARD, targeted synthetic disease-modifying anti-rheumatic drugs.</p> |            |             |             |             |

| <b>Supplementary Table 6.</b> Sensitivity analysis – Multivariable binary logistic regression analysis of factors associated with COVID-19 severity (outcome death)                                                                                                                                                                                                                                                                                                                                                                                                                                                                                                                                                                                                                                                            |                            |             |               |              |
|--------------------------------------------------------------------------------------------------------------------------------------------------------------------------------------------------------------------------------------------------------------------------------------------------------------------------------------------------------------------------------------------------------------------------------------------------------------------------------------------------------------------------------------------------------------------------------------------------------------------------------------------------------------------------------------------------------------------------------------------------------------------------------------------------------------------------------|----------------------------|-------------|---------------|--------------|
| <b>N deaths / survivors</b>                                                                                                                                                                                                                                                                                                                                                                                                                                                                                                                                                                                                                                                                                                                                                                                                    | <b>89 / 5070</b>           |             |               |              |
|                                                                                                                                                                                                                                                                                                                                                                                                                                                                                                                                                                                                                                                                                                                                                                                                                                | <b>N deaths/ survivors</b> | <b>OR</b>   | <b>95% CI</b> |              |
| Male sex (vs. female)                                                                                                                                                                                                                                                                                                                                                                                                                                                                                                                                                                                                                                                                                                                                                                                                          | 57 / 2605                  | <b>2.00</b> | <b>1.22</b>   | <b>3.26</b>  |
| Pandemic time period                                                                                                                                                                                                                                                                                                                                                                                                                                                                                                                                                                                                                                                                                                                                                                                                           |                            |             |               |              |
| Until June 15 <sup>th</sup> , 2020                                                                                                                                                                                                                                                                                                                                                                                                                                                                                                                                                                                                                                                                                                                                                                                             | 45 / 1723                  | 1           | [Reference]   |              |
| June 16, 2020, and later                                                                                                                                                                                                                                                                                                                                                                                                                                                                                                                                                                                                                                                                                                                                                                                                       | 44 / 3347                  | 0.67        | 0.41          | 1.10         |
| Comorbidities                                                                                                                                                                                                                                                                                                                                                                                                                                                                                                                                                                                                                                                                                                                                                                                                                  |                            |             |               |              |
| Three or more comorbidities (vs. 0 – 2 comorbidities)                                                                                                                                                                                                                                                                                                                                                                                                                                                                                                                                                                                                                                                                                                                                                                          | 36 / 435                   | <b>3.34</b> | <b>1.98</b>   | <b>5.63</b>  |
| Smoking habits                                                                                                                                                                                                                                                                                                                                                                                                                                                                                                                                                                                                                                                                                                                                                                                                                 |                            |             |               |              |
| Ever smoked (vs. never smoked)                                                                                                                                                                                                                                                                                                                                                                                                                                                                                                                                                                                                                                                                                                                                                                                                 | 20/ 1209                   | 0.76        | 0.41          | 1.39         |
| Unknown smoking habits (vs. never smoked)                                                                                                                                                                                                                                                                                                                                                                                                                                                                                                                                                                                                                                                                                                                                                                                      | 24 / 1141                  | 1.99        | 0.95          | 4.16         |
| Medication                                                                                                                                                                                                                                                                                                                                                                                                                                                                                                                                                                                                                                                                                                                                                                                                                     |                            |             |               |              |
| No DMARD therapy                                                                                                                                                                                                                                                                                                                                                                                                                                                                                                                                                                                                                                                                                                                                                                                                               | 21 / 714                   | 1           | [Reference]   |              |
| Methotrexate                                                                                                                                                                                                                                                                                                                                                                                                                                                                                                                                                                                                                                                                                                                                                                                                                   | 13 / 596                   | 0.57        | 0.26          | 1.24         |
| Leflunomide                                                                                                                                                                                                                                                                                                                                                                                                                                                                                                                                                                                                                                                                                                                                                                                                                    | 2 / 61                     | 0.58        | 0.11          | 3.03         |
| Sulfasalazine                                                                                                                                                                                                                                                                                                                                                                                                                                                                                                                                                                                                                                                                                                                                                                                                                  | 12 / 171                   | <b>2.64</b> | <b>1.13</b>   | <b>6.17</b>  |
| TNF inhibitors                                                                                                                                                                                                                                                                                                                                                                                                                                                                                                                                                                                                                                                                                                                                                                                                                 | 24 / 2360                  | <b>0.50</b> | <b>0.26</b>   | <b>0.98</b>  |
| IL-17 inhibitors                                                                                                                                                                                                                                                                                                                                                                                                                                                                                                                                                                                                                                                                                                                                                                                                               | 2 / 625                    | <b>0.11</b> | <b>0.02</b>   | <b>0.51</b>  |
| IL-23/IL-12+23 inhibitors                                                                                                                                                                                                                                                                                                                                                                                                                                                                                                                                                                                                                                                                                                                                                                                                      | 5 / 403                    | 0.39        | 0.13          | 1.14         |
| JAK inhibitors                                                                                                                                                                                                                                                                                                                                                                                                                                                                                                                                                                                                                                                                                                                                                                                                                 | 7 / 58                     | <b>7.49</b> | <b>2.61</b>   | <b>21.47</b> |
| Apremilast                                                                                                                                                                                                                                                                                                                                                                                                                                                                                                                                                                                                                                                                                                                                                                                                                     | 3 / 82                     | 1.05        | 0.25          | 4.40         |
| Disease activity (DA) and glucocorticoids (GCs)                                                                                                                                                                                                                                                                                                                                                                                                                                                                                                                                                                                                                                                                                                                                                                                |                            |             |               |              |
| Moderate/high DA (vs. remission/low DA)                                                                                                                                                                                                                                                                                                                                                                                                                                                                                                                                                                                                                                                                                                                                                                                        | 20 / 857                   | 1.12        | 0.60          | 2.06         |
| GC therapy (vs. no GC therapy)                                                                                                                                                                                                                                                                                                                                                                                                                                                                                                                                                                                                                                                                                                                                                                                                 | 18 / 352                   | <b>1.91</b> | <b>1.002</b>  | <b>3.64</b>  |
| NSAIDs                                                                                                                                                                                                                                                                                                                                                                                                                                                                                                                                                                                                                                                                                                                                                                                                                         | 16 / 1252                  | 0.81        | 0.42          | 1.54         |
| <p>Results for binary mixed effects logistic regression analysis in all patients, for the outcome death. Shown are fixed effects, random effects for country are not shown. Missing values are imputed via multiple imputation, patient numbers may thus be rounded. The model was additionally adjusted for age employing three-knot restricted cubic splines. Significant associations highlighted in bold.</p> <p>bDMARD, biological disease-modifying anti-rheumatic drugs; BMI, body mass index; csDMARD, conventional synthetic disease-modifying anti-rheumatic drugs; DMARD, disease-modifying anti-rheumatic drugs; IL, interleukin; JAK, Janus kinase; N, number; NSAID, non-steroidal anti-inflammatory drugs; TNF; tumour necrosis factor; tsDMARD, targeted synthetic disease-modifying anti-rheumatic drugs.</p> |                            |             |               |              |

**Supplementary figure 1.** Relationship between age and probability of hospitalisation (red) and death (blue) in patients with psoriatic arthritis (disease-specific model), estimated by three-knot restricted cubic splines, with 95% confidence intervals.

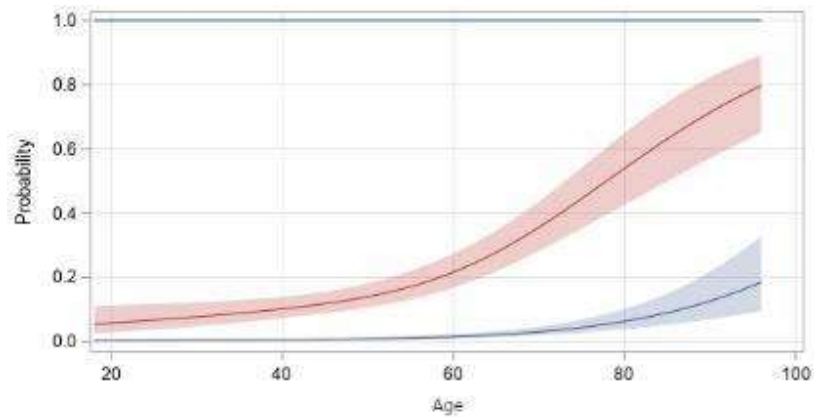

**Supplementary figure 2.** Relationship between age and probability of hospitalisation (red) and death (blue) in patients with axial spondyloarthritis (disease-specific model), estimated by three-knot restricted cubic splines, with 95% confidence intervals.

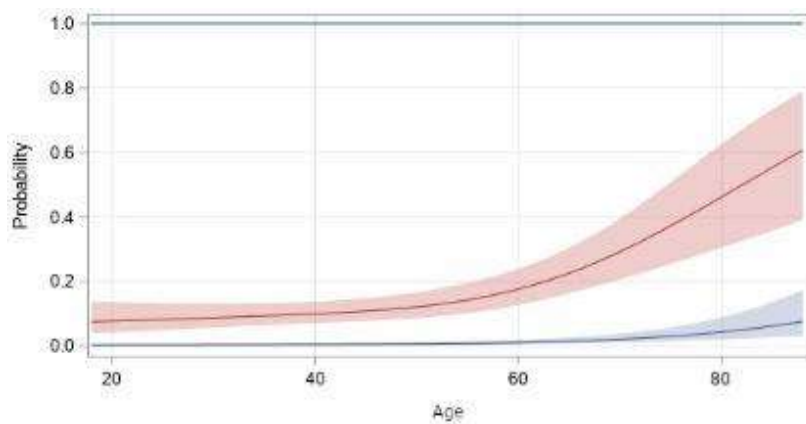

**Supplementary figure 3.** Relationship between age and probability of hospitalisation (red) and death (blue) in patients with psoriasis without arthritis (disease-specific model), estimated by three-knot restricted cubic splines, with 95% confidence intervals.

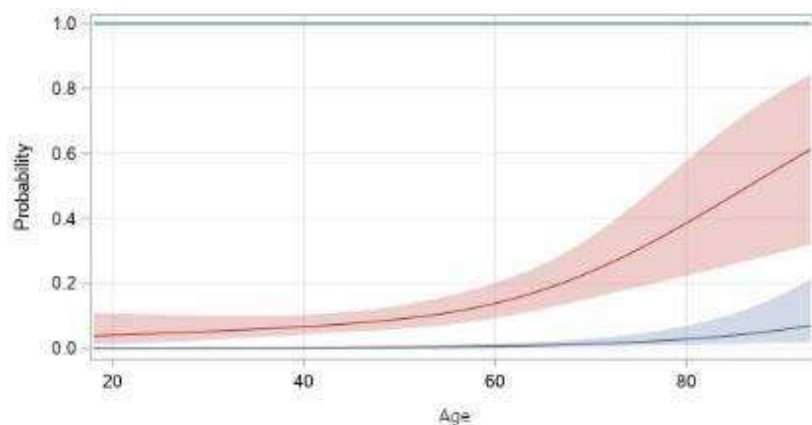

**Supplementary figure 4.** Relationship between age and probability of hospitalisation (red) and death (blue) estimated by four-knot restricted cubic splines, with 95% confidence intervals, for one imputation stratum (model with confirmed cases only).

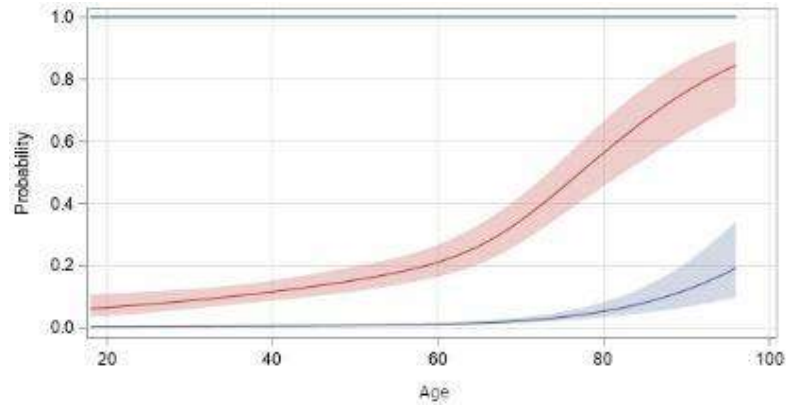

**Supplementary figure 5.** Relationship between age and probability of hospitalisation estimated by four-knot restricted cubic splines, with 95% confidence interval (binary outcome model: hospitalisation).

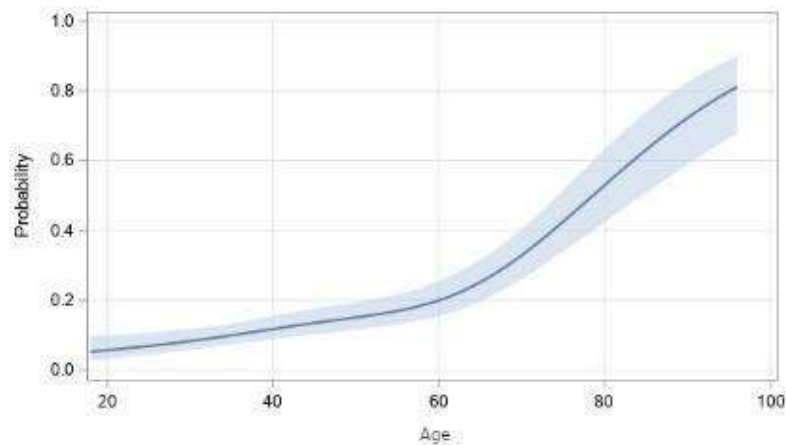

**Supplementary figure 6.** Relationship between age and probability of death estimated by three-knot restricted cubic splines, with 95% confidence interval, for one imputation stratum (binary outcome model: death).

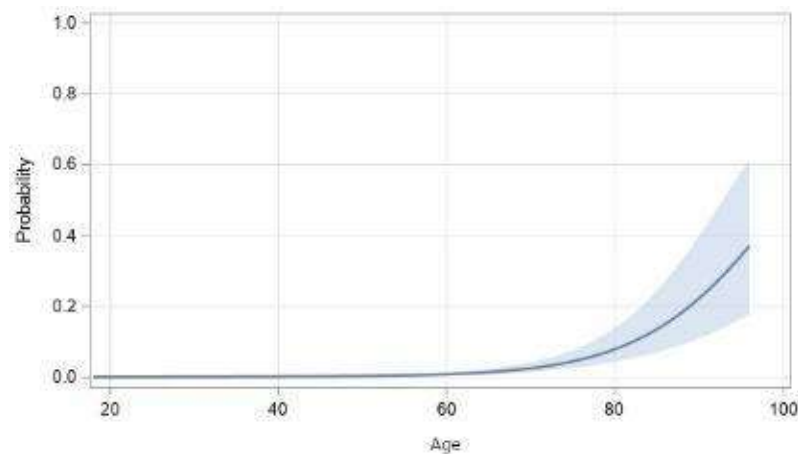

Supplement: inline-supplementary-material-2 [file inline-supplementary-material-2.pdf]
