# Supplementary material
Source: HighWire-hosted journal article supplement (https://ard.bmj.com/content/82/5/698)
Supplement: inline-supplementary-material-3 [file inline-supplementary-material-3.pdf]

**Appendix 1. COVID-19 Global Rheumatology Alliance (C19-GRA) Consortium.**

| <b>Name</b>                  | <b>Institution/Affiliation</b>                 |
|------------------------------|------------------------------------------------|
| Shafiq Fatima Akbar          | 124 Street Medical Group                       |
| Adriana de Oliveira Marinho  | Acre State Hospital Foundation                 |
| Noreen Nasir                 | Aga Khan University Hospital, Karachi Pakistan |
| Hesham Hamoud                | Al Azhar University Hospitals                  |
| Shraddha Jatwani             | Albert Einstein Medical Center, PA             |
| Shanmuganandan Krishnan      | APOLLO CLINIC                                  |
| Alba Paula                   | Argentine Society of Rheumatology              |
| Alvaro Andres Reyes Torres   | Argentine Society of Rheumatology              |
| Ana Bertoli                  | Argentine Society of Rheumatology              |
| Andrea Baños                 | Argentine Society of Rheumatology              |
| Boris Kisluk                 | Argentine Society of Rheumatology              |
| Carla Gobbi                  | Argentine Society of Rheumatology              |
| Carla Maldini                | Argentine Society of Rheumatology              |
| Carla Matellan               | Argentine Society of Rheumatology              |
| Carlevaris Leandro           | Argentine Society of Rheumatology              |
| Carolina Aeschlimann         | Argentine Society of Rheumatology              |
| Cecilia Goizueta             | Argentine Society of Rheumatology              |
| Cecilia Pisoni               | Argentine Society of Rheumatology              |
| Cecilia Romeo                | Argentine Society of Rheumatology              |
| Debora Guaglianone           | Argentine Society of Rheumatology              |
| Eugenia Picco                | Argentine Society of Rheumatology              |
| Fabian Risueño               | Argentine Society of Rheumatology              |
| Federico Nicolas Maldonado   | Argentine Society of Rheumatology              |
| Gelsomina Alle               | Argentine Society of Rheumatology              |
| Gimena Gómez                 | Argentine Society of Rheumatology              |
| Gisela Subils                | Argentine Society of Rheumatology              |
| Gustavo Fabián Rodríguez Gil | Argentine Society of Rheumatology              |
| Hernán Maldonado Ficco       | Argentine Society of Rheumatology              |
| Ivana Romina Rojas Tessel    | Argentine Society of Rheumatology              |

|                               |                                   |
|-------------------------------|-----------------------------------|
| Jonathan Eliseo Rebak         | Argentine Society of Rheumatology |
| José Luis Velasco Zamora      | Argentine Society of Rheumatology |
| Josefina Gallino Yanzi        | Argentine Society of Rheumatology |
| Juan Alejandro Albiero        | Argentine Society of Rheumatology |
| Julia Scafati                 | Argentine Society of Rheumatology |
| Julieta Silvana Morbiducci    | Argentine Society of Rheumatology |
| Karen Roberts                 | Argentine Society of Rheumatology |
| Karina Cogo                   | Argentine Society of Rheumatology |
| Lorena Takashima              | Argentine Society of Rheumatology |
| Luciana Casalla               | Argentine Society of Rheumatology |
| Luciana Gonzalez Lucero       | Argentine Society of Rheumatology |
| Ma. Alicia Lazaro             | Argentine Society of Rheumatology |
| María Alejandra Cusa          | Argentine Society of Rheumatology |
| María Alejandra Medina        | Argentine Society of Rheumatology |
| Maria de la Vega              | Argentine Society of Rheumatology |
| María Elena Calvo             | Argentine Society of Rheumatology |
| Maria Isabel Quaglia          | Argentine Society of Rheumatology |
| María J. Haye Salinas         | Argentine Society of Rheumatology |
| Maria Julieta Gamba           | Argentine Society of Rheumatology |
| Maria Marcela Schmid          | Argentine Society of Rheumatology |
| María Severina                | Argentine Society of Rheumatology |
| Maria Sol Castaños Menescardi | Argentine Society of Rheumatology |
| Maria Soledad Gálvez Elkin    | Argentine Society of Rheumatology |
| María Victoria Martire        | Argentine Society of Rheumatology |
| Mariana Pera                  | Argentine Society of Rheumatology |
| Marina Laura Werner           | Argentine Society of Rheumatology |
| Mercedes García               | Argentine Society of Rheumatology |
| Micaela Cosatti               | Argentine Society of Rheumatology |
| Natalia Herscovich            | Argentine Society of Rheumatology |
| Natalia Lili Cuchiaro         | Argentine Society of Rheumatology |
| Noelia German                 | Argentine Society of Rheumatology |

|                                      |                                            |
|--------------------------------------|--------------------------------------------|
| Pablo Maid                           | Argentine Society of Rheumatology          |
| Roberto Miguel Baez                  | Argentine Society of Rheumatology          |
| Rodolfo Perez Alamino                | Argentine Society of Rheumatology          |
| Romina Nieto                         | Argentine Society of Rheumatology          |
| Romina Tanten                        | Argentine Society of Rheumatology          |
| Rosana Gallo                         | Argentine Society of Rheumatology          |
| Rosana Quintana                      | Argentine Society of Rheumatology          |
| Sabrina Porta                        | Argentine Society of Rheumatology          |
| Sabrina Solange de la Vega Fernandez | Argentine Society of Rheumatology          |
| Sandra Petruzzelli                   | Argentine Society of Rheumatology          |
| Sebastián Moyano                     | Argentine Society of Rheumatology          |
| Silvana Conti                        | Argentine Society of Rheumatology          |
| Sofía Ornella                        | Argentine Society of Rheumatology          |
| Susana Isabel Pineda                 | Argentine Society of Rheumatology          |
| Tatiana Barbich                      | Argentine Society of Rheumatology          |
| Vanessa Castro Coello                | Argentine Society of Rheumatology          |
| Veronica Bellomio                    | Argentine Society of Rheumatology          |
| Veronica Savio                       | Argentine Society of Rheumatology          |
| Yohana Tissera                       | Argentine Society of Rheumatology          |
| Angela Dahle                         | Arthritis and Rheumatology Consultants, PA |
| Anne Wolff                           | Arthritis and Rheumatology Consultants, PA |
| Archibald Skemp                      | Arthritis and Rheumatology Consultants, PA |
| Emily Pfeifer                        | Arthritis and Rheumatology Consultants, PA |
| Hammad Bajwa                         | Arthritis and Rheumatology Consultants, PA |
| Jeffrey Wilson                       | Arthritis and Rheumatology Consultants, PA |
| Jennifer Morgan                      | Arthritis and Rheumatology Consultants, PA |
| Jody Hargrove                        | Arthritis and Rheumatology Consultants, PA |
| Maren Hilton                         | Arthritis and Rheumatology Consultants, PA |
| Nicholas Lebedoff                    | Arthritis and Rheumatology Consultants, PA |
| Sara Baig                            | Arthritis and Rheumatology Consultants, PA |
| Susan Leonard                        | Arthritis and Rheumatology Consultants, PA |

|                                |                                                                                             |
|--------------------------------|---------------------------------------------------------------------------------------------|
| Vernon Berglund                | Arthritis and Rheumatology Consultants, PA                                                  |
| Walter Dorman                  | Arthritis and Rheumatology Consultants, PA                                                  |
| Christopher Morris             | Arthritis Associates of Kingsport                                                           |
| Michael Cannon                 | Arthritis Consultants of Tidewater                                                          |
| Marcela Posada                 | Artmedica                                                                                   |
| Antonio Carlos Ximenes         | Artrocenter                                                                                 |
| Felipe Omura                   | Artrocenter                                                                                 |
| Flora Maria D Andrea Marcolino | Artrocenter                                                                                 |
| Gecilmara Pileggi              | Artrocenter                                                                                 |
| Jose Roberto Silva Miranda     | Artrocenter                                                                                 |
| Josephine Dhar                 | Ascension St. John Hospital                                                                 |
| Ellison Smith                  | Asheville Arthritis and Osteoporosis Center                                                 |
| Julie Levensgood               | Asheville Arthritis and Osteoporosis Center                                                 |
| Kristin Gowin                  | Asheville Arthritis and Osteoporosis Center                                                 |
| Brahim Dahou                   | Association Rhumatologues Algériens Privés (ARAP)                                           |
| Nicola Dalbeth                 | Auckland District Health Board                                                              |
| Eduardo Cepeda                 | Austin Diagnostic Clinic                                                                    |
| Yves Piette                    | AZ Sint-Jan Brugge                                                                          |
| Bea Maeyaert                   | AZ Sint-Lucas Brugge                                                                        |
| Mieke Devinck                  | AZ Sint-Lucas Brugge                                                                        |
| Karen Joyce Cortez             | Baguio General Hospital and Medical Center                                                  |
| Selda ÇELİK                    | BAKIRKOY DR SADI KONUK EDUCATIONAL AND RESEARCH HOSPITAL, RHEUMATOLOGY DEPARTMENT, Istanbul |
| Ozan Cemal Icacan              | Bakırköy Dr. Sadi Konuk Research And Training Hospital, Istanbul                            |
| Frances Stafford               | Blackrock Clinic                                                                            |
| Aarat Patel                    | Bon Secours Rheumatology Center                                                             |
| Lucy Thornton                  | Bradford Royal Infirmary                                                                    |
| Derrick Todd                   | Brigham and Women's Hospital                                                                |
| Jeffrey A. Sparks              | Brigham and Women's Hospital                                                                |
| Kristin D'Silva                | Brigham and Women's Hospital                                                                |
| Naomi Serling-Boyd             | Brigham and Women's Hospital                                                                |
| Tiffany Y-T Hsu                | Brigham and Women's Hospital                                                                |

|                                |                                                                     |
|--------------------------------|---------------------------------------------------------------------|
| Zachary Wallace                | Brigham and Women's Hospital                                        |
| Kendra Zuckerman               | Bryn Mawr Medical Specialists                                       |
| Suzanne Chapnick               | Cambridge Health Alliance                                           |
| Denise Hare                    | Capital Health Rheumatology                                         |
| Tina Linehan                   | Capital Health Rheumatology                                         |
| Laurie Bergstrom               | Catalina Pointe Arthritis                                           |
| Alain Sanchez Rodriguez        | Centro Medico ABC                                                   |
| Beatriz Elena Zazueta-Montiel  | Centro Medico del Angel                                             |
| Angel Alejandro Castillo Ortiz | Centro Medico Las Americas                                          |
| Jaime Hadid                    | Centro Medico Nacional 20 de Noviembre                              |
| Lilia Andrade Ortega           | Centro Medico Nacional 20 de Noviembre ISSSTE                       |
| Xóchitl Jiménez                | Centro Medico Naval                                                 |
| Erick Zamora Tehozol           | Centro Medico Pensiones                                             |
| Cummins Lue                    | CHI Little Rock Diagnostic Clinic                                   |
| Ho So                          | Chinese University of Hong Kong                                     |
| Mari Yamamoto                  | Chubu Rosai Hospital                                                |
| Cassandra Calabrese            | Cleveland Clinic                                                    |
| Sebastián Ibáñez               | Clínica Alemana de Santiago                                         |
| Juan Carlos Arana Ruiz         | Clinica de Excelencia en Reumatología                               |
| Sergio Durán-Barragán          | Clínica de Investigación en Reumatología y Obesidad                 |
| Lui Cajas                      | Clinica Universitaria Colombia - Centro Medico Providencia Sanitas  |
| Tea Ahel Pavelić               | Clinical Hospital Center Rijeka                                     |
| Samuel Katsuyuki Shinjo        | Clinical Hospital of Faculty of Medicine of University of Sao Paulo |
| Ricardo Xavier                 | Clinical Hospital of Porto Alegre                                   |
| Michel Alexandre Yazbek        | Clinical Hospital of University of Campinas                         |
| Montserrat Corteguera Coro     | Complejo Asistencial Avila                                          |
| Enrique Giraldo                | Complejo Hospitalario                                               |
| Anne-Marie Chassin-Trubert     | Complejo Hospitalario San José                                      |
| Sasha Dunt                     | Countess of Chester NHS Foundation Trust                            |
| Laura Muntean                  | County Emergency Hospital                                           |
| Ileana Filipescu               | County Emergency Hospital, Cluj Napoca                              |

|                                |                                                                                                   |
|--------------------------------|---------------------------------------------------------------------------------------------------|
| Ioana Felea                    | County Emergency Hospital, Cluj Napoca                                                            |
| Maria Magdalena Tamas          | County Emergency Hospital, Cluj Napoca                                                            |
| Simona Rednic                  | County Emergency Hospital, Cluj Napoca                                                            |
| Celia Fernandez                | Cullman Internal Medicine                                                                         |
| Barbara Goldstein              | Denver Arthritis Clinic                                                                           |
| Maria Greenwald                | Desert Medical Advances                                                                           |
| Branimir Anić                  | Div Clin Immunol Rheumatol; Dept Int Med, School of Med Zagreb, University Hospital Center Zagreb |
| Christopher Adams              | East Alabama Medical Center                                                                       |
| Jimmy Gene Villo               | East Avenue Medical Center                                                                        |
| Rizza Navarro                  | East Avenue Medical Center                                                                        |
| Arezou Khosroshahi             | Emory University                                                                                  |
| Eva Strakova                   | Faculty Hospital Prešov                                                                           |
| Nilzio Antonio da Silva        | Faculty of Medicine of Goias Federal University                                                   |
| Ricardo Acayaba de Toledo      | Faculty of Medicine of Sao Jose do Rio Preto                                                      |
| Babur Salim                    | Fauji Foundation Hospital                                                                         |
| Sandra Lucia Euzebio Ribeiro   | Federal University of Amazonas                                                                    |
| Viviane Angelina de Souza      | Federal University of Juiz de Fora                                                                |
| Adriana Maria Kakehasi         | Federal University of Minas Gerais                                                                |
| Ana Karla Guedes de Melo       | Federal University of Paraiba                                                                     |
| Haim Cesar                     | Federal University of Rio de Janeiro                                                              |
| Sueli Coelho da Silva Carneiro | Federal University of Rio de Janeiro                                                              |
| Edgard Torres dos Reis Neto    | Federal University of Sao Paulo                                                                   |
| Roberto Ranza                  | Federal University of Uberlandia                                                                  |
| Martina Skamlova               | FNSPFDR, Banská Bystrica                                                                          |
| Brian Oppermann MD             | Geisinger Health System                                                                           |
| Samia Araujo de Sousa Studart  | General Hospital of Fortaleza                                                                     |
| Adam Kilian                    | George Washington University                                                                      |
| Douglas White                  | Gundersen Health System                                                                           |
| Melanie Winter                 | Gundersen Health System                                                                           |
| Gozde Kübra Yardımcı           | Hacettepe University Faculty of Medicine                                                          |
| Umut Kalyoncu                  | Hacettepe University Faculty of Medicine                                                          |

|                                 |                                                                 |
|---------------------------------|-----------------------------------------------------------------|
| Gozd Kubra Yardımcı             | Hacettepe University Faculty of Medicine, Ankara                |
| Samar Al-Emadi                  | Hamad Medical Corporation                                       |
| Christine Graver                | Hampshire Hospitals NHS Trust                                   |
| Eva Rath                        | Hanusch Krankenhaus, Vienna                                     |
| Dimitrios Vassilopoulos         | Hippokration General Hospital, Athens                           |
| Luis Francisco Valdes Corona    | Hospital Angeles Lomas                                          |
| Mercedes Pinto Ortiz            | Hospital Ángeles Mocol                                          |
| Elisa Palalane                  | Hospital Central de Maputo                                      |
| Monica Vazquez del Mercado      | Hospital Civil de Guadalajara "Dr. Juan I. Menchaca"            |
| Jose A Gomez Puerta             | Hospital Clinic Barcelona                                       |
| CLAUDIA MARQUES                 | HOSPITAL DAS CLÍNICAS - UFPE                                    |
| Maria del Pilar Cruz Domínguez  | Hospital de Especialidades La Raza (asociación de escleroderma) |
| Gabriela Maria Guzman Melgar    | Hospital del Valle, Honduras                                    |
| Roberto Muñoz Louis             | Hospital Docente Padre Billini                                  |
| Juan Carlos Cobeta Garcia       | Hospital Ernest Lluch, Calatayud                                |
| Ariel Salinas                   | Hospital Essalud Alberto Sabogal Sologuren                      |
| Caroline Siegel                 | Hospital for Special Surgery                                    |
| Theodore Fields                 | Hospital for Special Surgery                                    |
| Mathia Cecilia Aguiar           | Hospital General Agustin O`horan                                |
| Everardo Alvarez Hernandez      | Hospital General de México "Dr. Eduardo Liceaga"                |
| Jose Eduardo Navarro Zarza      | Hospital General de Texco "Adolfo Prieto"                       |
| David Vega                      | Hospital General de Zona #17                                    |
| LUCIA MAYA                      | Hospital General de Zona #48 IMSS                               |
| Salvador Loredó Alanis          | Hospital General de Zona No. 3                                  |
| Fernando Cobos Villanueva       | Hospital General de Zona No. 30                                 |
| Mónica Nancy Fuentes-Hernandez  | Hospital General Issste Toluca                                  |
| Aline Ranzolin                  | Hospital Getulio Vargas                                         |
| Glauco Ricardo Werner de Castro | Hospital Gobernador Celso Ramos                                 |
| Jossiell Then Báez              | Hospital Metropolitano de Santiago(HOMS)                        |
| Vladimir Aroja Santos           | Hospital Municipal La Portada (Hospital Centinela de COVID-19)  |
| Maria Carmen Torres Martin      | Hospital Nuestra Señora Sonsoles, Avila                         |

|                                     |                                                                               |
|-------------------------------------|-------------------------------------------------------------------------------|
| Blanca Mota                         | Hospital Privado                                                              |
| Shakira Selvananda                  | Hospital Pulau Pinang                                                         |
| JOSE ANTONIO VELOZ ARANDA           | HOSPITAL REGIONAL ISSSTE LEON                                                 |
| BERNARDO CUNHA                      | HOSPITAL SARAH-BRASÍLIA                                                       |
| GUO RUEY LING                       | Hospital Sibü                                                                 |
| Juan José Alegre Sancho             | Hospital Universitari Dr Peset, Valencia                                      |
| Cassandra Michel Skinner Taylor     | Hospital Universitario "Dr. José Eleuterio González"                          |
| Dionicio Angel Galarza Delgado      | Hospital Universitario "Dr. José Eleuterio González"                          |
| Lorena Pérez-Barbosa                | Hospital Universitario "Dr. José Eleuterio González"                          |
| Francinne Machado Ribeiro           | Hospital Universitário Pedro Ernesto Universidade do Estado do Rio de Janeiro |
| Jose Campos                         | Hospital Universitario Puerta de Hierro                                       |
| Natalia de la Torre-Rubio           | Hospital Universitario Puerta de Hierro                                       |
| Iris Jazmin Colunga Pedraza         | Hospital Universitario, Universidad Autonoma de Nuevo Leon                    |
| Rebecca Grainger                    | Hutt Hospital                                                                 |
| Laurindo Ferreira da Rocha Junio    | IMIP                                                                          |
| David Alejandro Herrera-van Oostdam | IMSS                                                                          |
| Juárez Mora Ingrid Maribel          | IMSS                                                                          |
| LILIANA PABLO-OLIVARES              | IMSS                                                                          |
| Oscar Marquez-Miranda               | IMSS                                                                          |
| Rina Dalva Neubarth                 | Institute of Medical Assistance to State Civil Servants of Sao Paulo          |
| Concetta Lamore                     | Institute of Rheumatic and Autoimmune Diseases                                |
| Elliot Rosenstein                   | Institute of Rheumatic and Autoimmune Diseases                                |
| Melissa Harvey                      | Institute of Rheumatic and Autoimmune Diseases                                |
| Neil Kramer                         | Institute of Rheumatic and Autoimmune Diseases                                |
| Nicole Daver                        | Institute of Rheumatic and Autoimmune Diseases                                |
| Jiri Vencovsky                      | Institute of Rheumatology, Prague                                             |
| Maria Filkova                       | Institute of Rheumatology, Prague                                             |
| Andrés Zúñiga-Vera                  | Instituto de Reumatología, Hematología y Dermatología (IRHED)                 |
| Luis H. Silveira                    | Instituto Nacional de Cardiología                                             |
| Diana Cervántes Rosete              | Instituto Nacional de Ciencias Médicas y Nutrición Salvador Zubirán           |
| Eduardo Martín Nares                | Instituto Nacional de Ciencias Médicas y Nutrición Salvador Zubirán           |



|                               |                                                                             |
|-------------------------------|-----------------------------------------------------------------------------|
| Marina Rull Gabayet           | Instituto Nacional de Ciencias Médicas y Nutrición Salvador Zubirán         |
| Tatiana Sofia Rodriguez-Reyna | Instituto Nacional de Ciencias Médicas y Nutrición Salvador Zubirán         |
| Suneya Hogarty                | Integrative Arthritis and Pain Consultants                                  |
| Laurie Hughell                | Iowa Arthritis & Osteoporosis Center                                        |
| Lindsey Clark                 | Iowa Arthritis & Osteoporosis Center                                        |
| Mahdi Vojdanian               | Iran Rheumatology Center                                                    |
| Monique Hoekstra              | Isala Hospital, Zwolle                                                      |
| Theo Zijlstra                 | Isala Hospital, Zwolle                                                      |
| Servet Akar                   | Izmir Katip Celebi University Atatürk Training and Research Hospital, Izmir |
| Hirofumi Amano                | Juntendo University                                                         |
| Karen Yeter                   | Kaiser Permanente                                                           |
| Elena Nikiphorou              | King's College Hospital                                                     |
| Lucia Fusi                    | King's College Hospital                                                     |
| Rosaria Salerno               | King's College Hospital                                                     |
| Loreta Bukauskiene            | Klaipeda University Hospital                                                |
| Fatemah Abutiban              | Kuwait Rheumatology Association                                             |
| Elizabeth Macphie             | Lancashire and South Cumbria NHS Foundation Trust                           |
| Claire Vandavelde             | Leeds Teaching Hospitals NHS Trust                                          |
| Elizabeth Warner              | Lister Hospital                                                             |
| Caroline Mulvaney Jones       | Llandudno Hospital                                                          |
| VANEET SANDHU                 | Long Island Regional Arthritis Osteoporosis Care, PC                        |
| Leanna Wise                   | Los Angeles County + USC Medical Center                                     |
| Daniela Spisakova             | Louis Pasteur University Hospital, Košice                                   |
| Marieta Senčarová             | Louis Pasteur University Hospital, Košice                                   |
| Faizah Siddique               | Loyola University Medical Center                                            |
| Jennifer Magno                | Makati Medical Center                                                       |
| Ivy Rivera-Go                 | Manila Med                                                                  |
| Rachel Wallwork               | Massachusetts General Hospital                                              |
| Kristin M. D'Silva, MD        | Massachusetts General Hospital, Harvard Medical School                      |
| Naomi J. Patel, MD            | Massachusetts General Hospital, Harvard Medical School                      |
| Geraldine McCarthy            | Mater Misericordiae University Hospital                                     |

|                           |                                                            |
|---------------------------|------------------------------------------------------------|
| Alí Duarte-García         | Mayo Clinic Health System                                  |
| Emily Gilbert             | Mayo Clinic Health System                                  |
| Maria Valenzuela Almada   | Mayo Clinic Health System                                  |
| Marta Píčová              | Medipont plus s.ro. , České Budějovice                     |
| Gabriela Belakova         | Medman s.r.o., Martin                                      |
| Byung Ban                 | Medstar Georgetown University Hospital                     |
| Elaine Zobrist            | Mercy Hospital                                             |
| Lynn Ludmer               | Mercy Hospital                                             |
| Deshiré Alpízar-Rodríguez | Mexican College of Rheumatology                            |
| Jonathon Brooks           | Middlemore hospital                                        |
| Mark Sapsford             | Middlemore Hospital                                        |
| Sarah Horton              | Minerva Health Centre                                      |
| Farida Al Balushi         | Moh                                                        |
| Tamar Tanner              | Montefiore Medical Center                                  |
| Viktoriiia Vasylets       | Multifield Medical Centre, Odessa                          |
| Kyoko Motomura            | National Center for Global health and Medicine             |
| Shiro Ohshima             | National Hospital Organization Osaka Minami Medical Center |
| Dagmar Mičková            | National Institute of Rheumatic Diseases, Piešťany         |
| Helena Raffayova          | National Institute of Rheumatic Diseases, Piešťany         |
| Martin Zlnay              | National Institute of Rheumatic Diseases, Piešťany         |
| Olga Lukacova             | National Institute of Rheumatic Diseases, Piešťany         |
| Vanda Mlynarikova         | National Institute of Rheumatic Diseases, Piešťany         |
| Marina Hamaguchi          | Nihon University Itabashi Hospital                         |
| Jane Leeder               | Norfolk & Norwich University Hospital                      |
| Eric Ruderman             | Northwestern Memorial                                      |
| Evangeline Scopelitis     | Ochsner Medical Center Rheumatology Department             |
| Jerald Zakem              | Ochsner Medical Center Rheumatology Department             |
| Karen Toribio Toribio     | Ochsner Medical Center Rheumatology Department             |
| Robert Quinet             | Ochsner Medical Center Rheumatology Department             |
| Tameka Webb-Detiege       | Ochsner Medical Center Rheumatology Department             |
| William Davis             | Ochsner Medical Center Rheumatology Department             |

|                         |                                                         |
|-------------------------|---------------------------------------------------------|
| Laura Sampson           | Orthopaedics and Rheumatology of the North Shore (ORNS) |
| NORIHIRO NISHIMOTO      | Osaka Rheumatology Clinic                               |
| Kristen Young           | Parkland Hospital                                       |
| Inita Bulina            | Pauls Stradins Clinical University Hospital, Riga       |
| Julija Zepa             | Pauls Stradins Clinical University Hospital, Riga       |
| Sow Lai Kan             | Penang General Hospital                                 |
| Márta Király            | Petz Aladár University Teaching Hospital, Győr          |
| Soňa Žlnayová           | Poliklinika MarMedico, s.r.o., Nové Mesto nad Váhom     |
| Mauro Keiserman         | Pontifical Catholic University of Rio Grande do Sul     |
| A. Patrice Pollock      | Private Practice                                        |
| Abeer Eid               | Private Practice                                        |
| Ashley Maier            | Private Practice                                        |
| Atzintli Martínez       | Private Practice                                        |
| Cara Bailey             | Private Practice                                        |
| Caroline Arroyo         | Private Practice                                        |
| David Snow              | Private Practice                                        |
| Eduardo Martin-Nares    | Private Practice                                        |
| Elvia Moreta            | Private Practice                                        |
| Ericsson Trieu          | Private Practice                                        |
| Ernst Markus Klaus      | Private Practice                                        |
| Fedra Irazoque          | Private Practice                                        |
| Genevieve Katigbak      | Private Practice                                        |
| Gilbert Kepecs          | Private Practice                                        |
| Greta Reyes-Cordero     | Private Practice                                        |
| Jaimie Russell          | Private Practice                                        |
| Jessica Chapman         | Private Practice                                        |
| Joseph Huffstutter      | Private Practice                                        |
| Kara Long               | Private Practice                                        |
| Khurram Abbass          | Private Practice                                        |
| Lauren Kaufman          | Private Practice                                        |
| Marco Martinez Martinez | Private Practice                                        |

|                           |                                               |
|---------------------------|-----------------------------------------------|
| MONICA MACIAS-PALACIOS    | Private Practice                              |
| NAGA PRABU                | Private Practice                              |
| Paloma De Abreu Trigueros | Private Practice                              |
| Raheem Kherani            | Private Practice                              |
| Randall Beyl              | Private Practice                              |
| Sarah Middleton           | Private Practice                              |
| Sharath Kumar             | Private Practice                              |
| Susan Barrett             | Private Practice                              |
| Viktoria Pavlova          | Private Practice                              |
| Yanira Yinde              | Private Practice                              |
| Samir Patel               | Queen Elizabeth Hospital Woolwich             |
| Alexandra Balbir-Gurman   | Rambam Rheumatology Institute, Haifa          |
| Bruno Ferreira            | Rede Sarah de Hospitais de Rabilitação        |
| Kathleen Anthony          | Rheumatology and Osteoporosis Specialists     |
| Richard Stern             | Rheumatology Associastes                      |
| Lilliam Miranda           | Rheumatology Center INC                       |
| Shabbir Chikani           | Rheumatology centre, HCG hospital             |
| Ann Clarke                | Richmond Road Diagnostic And Treatment Center |
| Ammar Haikal              | Riverside Medical Group                       |
| Michael Guma              | Riverside Medical Group                       |
| Sushama Mody              | Riverside Medical Group                       |
| Diana O'Kane              | RNHRD at Royal United Hospital Bath           |
| Sheila O'Reilly           | Royal Derby Hospital                          |
| HUMAID AL WAHSHI          | Royal Hospital                                |
| Nasra Al-Adhoubi          | Royal Hospital                                |
| Jenny Tyler               | Royal United hospital                         |
| Jennifer Tyler            | Royal United Hospital, Bath                   |
| Vivien Hsu                | Rutgers Robert Wood Johnson                   |
| Mária Oetterová           | Safarik University hospital, Kosice           |
| Audrey Low                | Salford Royal NHS FT                          |
| Beverley Harrison         | Salford Royal NHS FT                          |

|                                                      |                                                                      |
|------------------------------------------------------|----------------------------------------------------------------------|
| Guillermo Pons-Estel                                 | Sanatorio Parque                                                     |
| Mariana Peixoto Guimaraes Ubirajara e Silva de Souza | Santa Casa of Belo Horizonte                                         |
| Carolina Zorzanelli Costa                            | Santa Casa of Vitoria                                                |
| Veronika Sharp                                       | Santa Clara Valley Medical Center                                    |
| Laura Groseanu                                       | Sf Maria Clinical Hospital, Bucharest                                |
| Daric Mueller                                        | Shores Rheumatology PC                                               |
| Lillian Barra                                        | SJHC London                                                          |
| Tom Appleton                                         | SJHC London                                                          |
| South African Rheumatism and Arthritis Association   | South Africa                                                         |
| Laura Chadwick                                       | St Helens & Knowsley NHS Foundation Trust                            |
| Richard Conway                                       | St James' Hospital, Dublin                                           |
| Janet Pope                                           | St. Joseph's Health Care                                             |
| Maria del Carmen Hernandez                           | Star Medica Centro                                                   |
| Cecília Resende Brunow Bazzo                         | State University of Londrina                                         |
| Steven Feldman                                       | Steven Feldman MD PA                                                 |
| Anna Sabová                                          | Súkromná Reumatologická Ambulancia, Vranov nad Topľou                |
| Talal Ali Al Lawati                                  | Sultan Qaboos University Hospital                                    |
| Rachael Flood                                        | Tallaght University Hospital                                         |
| MOOIKHIN HNG                                         | Tareum                                                               |
| Arundathi Jayatilleke                                | Temple University Hospital                                           |
| Simeon Grazio                                        | The teaching hospital sisters of charity                             |
| Keiko Koshiba                                        | Toho University Omori Medical Center                                 |
| Masashi Funada                                       | Toho University Omori Medical Center                                 |
| Midori Sato                                          | Tokyo Medical Center                                                 |
| Fukumi NAKAMURA                                      | Tokyo Metropolitan Bokutoh General Hospital                          |
| Kazuhisa Yokota                                      | Tokyo Metropolitan Health and Hospitals Corporation, Ebara Hosipital |
| Lingli Dong                                          | Tongji Hospital                                                      |
| A. Silvia Ross                                       | Triangle Arthritis & Rheumatology                                    |
| John FitzGerald                                      | UCLA                                                                 |
| Tanaz Kermani                                        | UCLA                                                                 |
| Boris Karanovic                                      | UHC Zagreb                                                           |

|                              |                                                                                               |
|------------------------------|-----------------------------------------------------------------------------------------------|
| Alojzija Hocevar             | UMC Ljubljana                                                                                 |
| Martina Bakosova             | UNB Nemocnica Stare Mesto, Bratislava                                                         |
| Manuel Ugarte-Gil            | Universidad Científica del Sur-Hospital Guillermo Almenara Irigoyen                           |
| Marcelo Pinheiro             | Universidade Federal De São Paulo Escola Paulista de Medicina e Escola Paulista de Enfermagem |
| Su-Ann Yeoh                  | University College London Hospital                                                            |
| Maria Oetterova              | University Hospital                                                                           |
| Nicola Gullick               | University Hospital                                                                           |
| Emőke Šteňová                | University Hospital Bratislava                                                                |
| Marko Barešić                | University Hospital Center Zagreb                                                             |
| Ivan Padjen                  | University Hospital Centre Zagreb                                                             |
| Melanie-Ivana Čulo           | University Hospital Dubrava, Zagreb                                                           |
| Wilson Bautista Molano       | University Hospital Fundación Santa Fe de Bogotá                                              |
| James Pilcher                | University Hospital Lewisham                                                                  |
| Kristina Kovačević Stranski  | University Hospital Osijek                                                                    |
| Lubica Capova                | University Hospital, Bratislava                                                               |
| Zelmira Macejova             | University Hospital, Košice                                                                   |
| Jarosław Nowakowski          | University Hospital, Krakow                                                                   |
| Takashi Kida                 | University Hospital, Kyoto Prefectural University of Medicine                                 |
| SAUDATU ISSAKA               | University Hospitals                                                                          |
| Licia Maria Henrique da Mota | University of Bras                                                                            |
| JoAnn Zell                   | University of Colorado                                                                        |
| Christine Peschken           | University of Manitoba                                                                        |
| Angelito Flora               | University of the Philippines, Philippine General Hospital                                    |
| Evelyn Salido                | University of the Philippines, Philippine General Hospital                                    |
| Geraldine Zamora             | University of the Philippines, Philippine General Hospital                                    |
| Alison Bays                  | University of Washington, Seattle                                                             |
| David Karp                   | UT Southwestern Medical Center                                                                |
| Ezzati Fatemeh               | UT Southwestern Medical Center                                                                |
| Guillermo Quiceno            | UT Southwestern Medical Center                                                                |
| Kathryn Dao                  | UT Southwestern Medical Center                                                                |
| APARNA DAS                   | UTMB                                                                                          |

Lauro Quintanilla

Vicki Quincey

Deborah Parks

Kelly Weselman

Fabiane Shizue Sakai

Katie Williams

Kirsty Devine

Lenny Geurts-van Bon

Sarah Goglin

Virginia Medica

Waikato Hospital

Washington University Div of Rheumatology

Wellstar Kennestone Hospital

Windmills Hospital

York District Hospital

York/Scarborough Hospitals

Ziekenhuisgroep Twente

Zuckerberg San Francisco General Hospital

## Appendix 2. Psoriasis Patient Registry for Outcomes, Therapy and Epidemiology of COVID-19 Infection (PsoProtect) Consortium.

### Name

A van geest  
Aadarsh Shah  
AC de Waal  
Alba Catala  
Alberto Barea  
Alberto Romero Maté  
Alekya Singapore  
Alexandra Paolino  
Alexandra Vincent  
Alice Mwale  
Alison Sears  
Amy de la Breteque  
Amy Foulkes  
Ana Brasileiro  
Ana Maria Morales Callaghan  
Ana Martinez  
Andrea Carugno  
Andrea Chiricozzi  
Andrea Conti  
Andrew DeCrescenzo  
Andrew Pink  
Angela Braeger  
Anke Piekar  
Ann Jones  
Ann Sergeant  
Anna Baran



Anne Groeneveld  
Annette Essex  
Anthony Bewley  
Antoine Fauconneau  
Antony Raharja  
Aparna Sinha  
Areti Makrygeorgou  
Arias Martín Nadia  
Astrid van Huizen  
Beata Fabos  
Beatriz Pérez Suárez  
Benhadou Farida  
Birgitta Wilson Claréus  
Bola Coker  
Canelle Mazaud  
Caoimhe Fahy  
Caoimhe M. R. Fahy  
Carla Tubau Prims  
Carmen Bugarin Diz  
Caroline Campbell  
Carolyn Martin  
Carrie Davis  
Catherine Holden  
Catherine Motosko  
Catherine Quinlan  
Catriona Maybury  
Cesar Gonzalez  
Charlotte Barclay  
Chifari Angelo  
Choon Siew Eng

Cid Yazigi Sabbag  
Claudia de la Cruz  
Claudia Guebenlian Bakerdjian  
Claudio Greco  
Cristina Echeverria  
Cristina Mariela Echeverría  
Dagmara Samselska  
Danang Tri Wahyudi  
Daniela Armijo  
Danielle Brassard  
Daryl Teo  
David Fairhurst  
Deanna Cummings  
Deepti Kolli  
Denis Jullien  
Denise Peeters  
Descamps Vincent  
Diana Patricia Ruiz Genao  
Diana Ruiz Genao  
Eileen Parry  
Elaine Agius  
Eleanor Henderson  
Elena Hawryluk  
Eliseo Martínez-García  
Elizabeth Molina  
Elizabeth Stewart  
Ellie Henderson  
Elzbieta Klujso  
Emily Brown  
Emily Dwyer

Emmanuel Mahe  
Emmanuel Toni  
Emmerson Gale Vista  
Emmylou Casanova  
Enikö Sonkoly  
Enrique Loayza  
Erin Kamp  
Esteban Daudén  
Esther Balogh  
F Aubin  
Felicity Edwards  
Ferial Ismail  
Fernando Valenzuela  
Fikki Orekoya  
Florentina-Silvia Delli  
Francesca Capon  
Freya Meynell  
Gabriel Magariños  
Gabrielle Becher  
Gabrielle Key  
Gaelle Quereux  
Gaurav Dhawan  
Gemma Keogh  
Georgi Popov  
Georgie King  
Girard Celine  
Gloria Aparicio  
Gordana Krnjevic Pezic  
Graham Johnston  
Gustavo Anibal Cardozo

H. El Khattabi  
Haleema Alfailakawi  
Hazel Oon  
Hazel Rooney  
Helen McAteer  
Helene Aubert  
Hervé Bachelez  
Hoseah Waweru  
Ian Pearson  
Ignacio Yanguas  
Iman Kotb  
Ines Barbosa  
Isabella Tosi  
J Charles  
Jack French  
James John Murphy  
Jamie Weisman  
Jennifer Elias  
Jennifer Soung  
Jenny Carolan  
Jenny Hughes  
Jill Ramsay  
Jing Husaini  
JM. Ortiz  
Jo Lambert  
Joanne Topliffe  
Joel M Gelfand  
John Newsham  
Jonathan Ng  
Jose-Manuel Carrascosa

Joseph J Schwartz  
Julia Bowman  
Julie Charles  
Juul van de Reek  
Karina Jackson  
Karolina Vorčáková  
Katarzyna Gryś  
Katherine Poirier  
Kathryn Kerisit, MD  
Kayleigh J Mason  
Keith Wu  
Kimberly Anne G. Ednalino  
Kirsty Wynes  
Kyle Eash  
Lars Iversen  
Laura Speck  
Laure Mery-Bossard  
Lauren Booker  
Leah Hoggan  
leandro perrotat  
Leila Asfour  
Leila Kattach  
Leontien de Graaf  
Lesort Cécile  
Lian van der Gang  
Lieve Meuleman  
Lim Jin Huang  
Linda Lawson  
Linda McMahan  
Line Kibsgaard

Lisa Kirby  
Lisa van der Rijst  
Liv Eidsmo  
Lluís Rusiñol Batlle  
Lone Skov  
Lorraine Gribben  
Lucy Moorhead  
Luigi Naldi  
Luis Puig  
Lyndsey Florence  
M.M. Bakker  
Mahira Hamdy El Sayed  
Mahmood Abubakar  
Malcolm Rustin  
Manel Velasco  
Mangiarotti Germán  
Manisha Panchal  
Manja Bloem  
Manpreet Lakhan  
Manuel Dario Franco  
Mara Maccarone  
Margot Common  
Maria Fernanda Lui  
Marie Dedroog  
Marie-Eve Fortier  
Marie-Louise Svensson  
Mariusz Sikora  
Mark Vandaele  
Maruska Marovt  
Masanori Okuse

Matthias Schmuth  
Melanie Bruton  
Melanie Claridge  
Melanie westmoreland  
Melissa Sweeney  
Michela Magnano  
Mireille van Baar  
Miriam Saposnik  
Mohamed EL-Komy  
Musumeci Maria Letizia  
N Beneton  
Nick J Reynolds  
Nick Reynolds  
Nora Noemí Kogan  
Omid Zargari  
Pablo De Caso  
Pamela Campbell  
Paola Di Meglio  
Paolo Gisondi  
Paula Bourren  
Paula luna  
Paulo Varela  
Penny Nash  
Peter Foley  
Peter Holló  
Peter Jenkin  
Phan Céline  
Philip Hampton  
Phyllis Spuls  
Pia Tookey

Piergiacomo Calzavara-Pinton  
Portia Goldsmith  
Pter Holló  
Rachel Bak  
Radhika Patel  
Raquel Rivera Diaz  
Rebecca Rose  
Reinhart Speeckaert  
Ricardo Romiti  
Richard Warren  
Richard Woolf  
Rogelio Mercado  
Rohima Khatun  
Rolland Gyulai  
Romana Ceovic  
Romana Machackova  
Ronald Vender  
Rosa Andres Ejarque  
Rosa Taberner  
Rosalie Juch  
Russell cohen md faad  
Sandy McBride  
Sara Cacciapuoti  
Sarah Drummond  
Sarah Kirk  
Sarah McCusker  
Saskia Reeken  
Selva Anahí Gutiérrez Yañez  
Shanti Ayob  
Shrita Shinton



Silvia Pérez Barrio  
Simina Stefanescu  
Sinan Doğan  
Sinéad M Langan  
Sophia Mohme  
Sophia Strong-Sheldrake  
Sophie Wanten  
Stefano Piaserico  
Stephanie Ball  
Stephanie Ogden  
Susan Ann Lloyd  
Susan Hall  
Susan Woollett  
Susana Armesto Alonso  
Susannah Hoey  
Taku Suzuki  
Tatiana del Río  
Tatiana Pecova  
Teena Mackenzie  
Telgdy Enikő  
Teresa Tsakok  
Thomas Beaulieu  
Tiago Torres  
Ting Seng Tang  
Tom Hillary  
Tomas Kampe  
Toomas Talme  
Tracy Brown  
Tracy Smith  
Tran Hong Truong

Trupti Desai  
Victoria Brown  
Victoria King  
Vito Di Lernia  
Wisam Alwan  
Ya-Hsin Wang  
Yena Kim  
Zafeiriou Efterpi  
zahira koreja  
Zaida Troyano  
Zeeshaan Hasan  
Zeljko Mijuskovic  
Zenas Yiu  
Zeynep Topkarci
